# Supplementary material for: Cooperativity in luminescent heterobimetallic diphosphine-β-diketiminate complexes
Source: Royal Society of Chemistry journal article supplement (doi:10.1039/d3qi01740k), 2023-12-22
Supplement: d3qi01740k2.pdf [file d3qi01740k2.pdf]

**PNacAu (1)**

81

1 PNacAu Singlet E(DFT)=-2509.0321081 ZPVE=0.6523657

Au -0.0438378 -0.5413403 -0.4538730

P 1.1022562 0.8220599 -1.9856580

P -1.5666001 -1.7135514 0.8958605

N 0.6483406 -0.6791873 2.3464964

N 2.4770011 0.6395935 0.4488466

C 0.2804682 -1.8796971 2.8693862

C 2.4395019 1.5717227 1.3710435

C 0.9061309 0.4142824 3.0314314

C -2.6742341 -0.4823657 1.6725216

C 3.3810530 0.5793449 -0.5758206

C 0.1465583 1.6582433 -4.5317078

H 0.0293079 2.6591315 -4.1121348

C 1.6277900 1.5113383 2.5252462

H 1.6620507 2.3910053 3.1708743

C 0.7735099 -0.6588366 -4.2977205

H 1.1478372 -1.4823038 -3.6820995

C -0.7746932 -2.5990296 2.2459398

C 0.6481750 0.6214980 -3.7425439

C 1.4719374 4.9057651 -1.8199032

H 2.0938239 5.6713466 -2.2909983

C -2.6891141 -2.9048021 0.0929713

C 3.7457048 0.4556453 -3.0003041

H 3.3393264 0.4711822 -4.0149345

C 1.6328588 3.5699735 -2.1727540

H 2.3924314 3.2888170 -2.9072734

C -2.9638804 -0.5134373 3.0377199

H -2.5280532 -1.2942726 3.6653741

|   |            |            |            |
|---|------------|------------|------------|
| C | 0.8424346  | 2.5813558  | -1.5750552 |
| C | 0.5311746  | 5.2635692  | -0.8541766 |
| H | 0.4135999  | 6.3122247  | -0.5682836 |
| C | -0.0702186 | 0.1508239  | -6.4073317 |
| H | -0.3503079 | -0.0320323 | -7.4480452 |
| C | -2.2359651 | -3.6012153 | -1.0312703 |
| H | -1.2402870 | -3.3890347 | -1.4312364 |
| C | -0.0931415 | 2.9462469  | -0.6045808 |
| H | -0.6856966 | 2.1773998  | -0.1020680 |
| C | -0.2123738 | 1.4212601  | -5.8583346 |
| H | -0.6061057 | 2.2405610  | -6.4655251 |
| C | 0.4250653  | -0.8910701 | -5.6228663 |
| H | 0.5334466  | -1.8933305 | -6.0454184 |
| C | -1.1363493 | -3.8791557 | 2.6727081  |
| H | -1.9466393 | -4.4101784 | 2.1666572  |
| C | -3.0477575 | -4.5507547 | -1.6451502 |
| H | -2.6845470 | -5.0903256 | -2.5235445 |
| C | 2.8901150  | 0.5932395  | -1.9056404 |
| C | -0.2466230 | 4.2830069  | -0.2446575 |
| H | -0.9714021 | 4.5535111  | 0.5271434  |
| C | 5.1122513  | 0.2989340  | -2.8005930 |
| H | 5.7850816  | 0.1906301  | -3.6544191 |
| C | 0.5641903  | -3.7813711 | 4.3675553  |
| H | 1.0980220  | -4.2464720 | 5.2017629  |
| C | 4.7699768  | 0.4080445  | -0.4008094 |
| H | 5.1663796  | 0.3618514  | 0.6158265  |
| C | 3.2852393  | 2.8244801  | 1.2110137  |
| H | 4.3465079  | 2.6169256  | 1.4273977  |
| H | 2.9504970  | 3.6212681  | 1.8911949  |
| H | 3.2308743  | 3.1983982  | 0.1757048  |

C -3.9715348 -3.1615637 0.5879061  
H -4.3391656 -2.6156243 1.4603118  
C 5.6125844 0.2749024 -1.4943548  
H 6.6859944 0.1426834 -1.3292606  
C -0.4736301 -4.4773986 3.7367969  
H -0.7553748 -5.4785550 4.0705993  
C -4.7851655 -4.1070287 -0.0307886  
H -5.7874930 -4.2996804 0.3604992  
C -3.7956625 0.4530638 3.6003509  
H -4.0110269 0.4245054 4.6716507  
C -4.3236955 -4.8040979 -1.1457347  
H -4.9643483 -5.5450170 -1.6313034  
C -4.3454059 1.4535521 2.8032954  
H -4.9947344 2.2128785 3.2470353  
C -3.2280658 0.5267565 0.8764360  
H -2.9989926 0.5615396 -0.1927081  
C 0.9392327 -2.5156198 3.9473390  
H 1.7731071 -1.9992114 4.4269540  
C -4.0627426 1.4873451 1.4381362  
H -4.4898513 2.2715624 0.8076022  
C 0.3926212 0.5722099 4.4557258  
H -0.4555428 -0.0979842 4.6594545  
H 0.0710229 1.6112820 4.6292641  
H 1.1847772 0.3485829 5.1908482

81

1 PNAcAu Triplet E(DFT)=-2508.9433759 ZPVE=0.6493884

Au -0.1266753 -0.5741607 -0.5614554  
P 1.0755752 0.7828337 -2.0528644  
P -1.5970325 -1.7020532 0.8741268  
N 0.5329445 -0.6700068 2.4336434

|   |            |            |            |
|---|------------|------------|------------|
| N | 2.3853496  | 0.7657072  | 0.4514061  |
| C | 0.2333003  | -1.9085249 | 2.8751542  |
| C | 2.4538859  | 1.6325647  | 1.4849785  |
| C | 1.0122536  | 0.3167008  | 3.2262970  |
| C | -2.6518165 | -0.4457773 | 1.6829109  |
| C | 3.3120254  | 0.7099070  | -0.5411173 |
| C | 0.2731270  | 1.5561915  | -4.6686416 |
| H | 0.1536464  | 2.5713167  | -4.2853482 |
| C | 1.7831905  | 1.3886739  | 2.7028343  |
| H | 1.9843916  | 2.1627237  | 3.4532332  |
| C | 0.8376270  | -0.7649821 | -4.3318386 |
| H | 1.1606541  | -1.5762076 | -3.6724097 |
| C | -0.7929845 | -2.6294196 | 2.1878866  |
| C | 0.7069725  | 0.5337590  | -3.8226486 |
| C | 1.3719202  | 4.8728040  | -1.9141177 |
| H | 2.0180947  | 5.6416054  | -2.3455301 |
| C | -2.7778989 | -2.8519522 | 0.0935579  |
| C | 3.7595660  | 0.4778601  | -2.9460450 |
| H | 3.3843757  | 0.4164822  | -3.9708652 |
| C | 1.5806947  | 3.5351396  | -2.2330619 |
| H | 2.4014652  | 3.2559409  | -2.8991998 |
| C | -2.8309592 | -0.4122933 | 3.0662812  |
| H | -2.3396478 | -1.1583319 | 3.6948962  |
| C | 0.7609928  | 2.5424981  | -1.6837955 |
| C | 0.3525264  | 5.2288358  | -1.0311992 |
| H | 0.1970630  | 6.2792839  | -0.7712390 |
| C | 0.1318376  | -0.0030487 | -6.5087429 |
| H | -0.0925346 | -0.2117552 | -7.5580456 |
| C | -2.4166065 | -3.4973502 | -1.0922086 |
| H | -1.4508215 | -3.2742002 | -1.5545356 |

|   |            |            |            |
|---|------------|------------|------------|
| C | -0.2542905 | 2.9056432  | -0.7962212 |
| H | -0.8744348 | 2.1340419  | -0.3323251 |
| C | -0.0147794 | 1.2860466  | -6.0060915 |
| H | -0.3562066 | 2.0939032  | -6.6585344 |
| C | 0.5602516  | -1.0302368 | -5.6676192 |
| H | 0.6721917  | -2.0464600 | -6.0543049 |
| C | -1.1309172 | -3.9336263 | 2.5423659  |
| H | -1.9246098 | -4.4550870 | 2.0019088  |
| C | -3.2818397 | -4.4112005 | -1.6880438 |
| H | -2.9902575 | -4.9110139 | -2.6152844 |
| C | 2.8625426  | 0.6099511  | -1.8864550 |
| C | -0.4566237 | 4.2443902  | -0.4703522 |
| H | -1.2451758 | 4.5143625  | 0.2364889  |
| C | 5.1283682  | 0.4276970  | -2.7035466 |
| H | 5.8317076  | 0.3178181  | -3.5319792 |
| C | 0.5566928  | -3.8954965 | 4.2588334  |
| H | 1.1004906  | -4.4005473 | 5.0628710  |
| C | 4.7105113  | 0.6637354  | -0.3241448 |
| H | 5.0809761  | 0.7028541  | 0.7018822  |
| C | 3.2024982  | 2.9408424  | 1.3313792  |
| H | 4.2993081  | 2.8196705  | 1.2777079  |
| H | 2.9877090  | 3.6202923  | 2.1711547  |
| H | 2.8978676  | 3.4520420  | 0.3997226  |
| C | -4.0230098 | -3.1236240 | 0.6703480  |
| H | -4.3182115 | -2.6173181 | 1.5928725  |
| C | 5.5893817  | 0.5195948  | -1.3851382 |
| H | 6.6638515  | 0.4723020  | -1.1843042 |
| C | -0.4608379 | -4.5786017 | 3.5783169  |
| H | -0.7210967 | -5.6039713 | 3.8497400  |
| C | -4.8897145 | -4.0330126 | 0.0710407  |

|   |            |            |            |
|---|------------|------------|------------|
| H | -5.8619787 | -4.2377435 | 0.5267112  |
| C | -3.6243666 | 0.5760521  | 3.6456197  |
| H | -3.7521936 | 0.5992935  | 4.7309333  |
| C | -4.5193215 | -4.6793354 | -1.1071683 |
| H | -5.2017927 | -5.3921588 | -1.5775954 |
| C | -4.2457866 | 1.5332249  | 2.8478738  |
| H | -4.8649584 | 2.3095511  | 3.3050931  |
| C | -3.2768593 | 0.5193040  | 0.8853587  |
| H | -3.1364253 | 0.5020167  | -0.1996496 |
| C | 0.8956856  | -2.5954784 | 3.9312428  |
| H | 1.7127305  | -2.0963552 | 4.4519347  |
| C | -4.0736641 | 1.5016252  | 1.4644068  |
| H | -4.5587415 | 2.2503810  | 0.8326094  |
| C | 0.7011047  | 0.3665137  | 4.7088949  |
| H | -0.2363304 | -0.1707119 | 4.9312347  |
| H | 0.5726472  | 1.4125689  | 5.0378535  |
| H | 1.4814050  | -0.0745036 | 5.3600628  |

### **PNacAg (2)**

81

2 PNacAg Singlet E(DFT)=-2520.2702651 ZPVE=0.6523166

|    |            |            |            |
|----|------------|------------|------------|
| Ag | -0.6828390 | -0.4823248 | -0.0500829 |
| P  | -0.2076315 | -0.5356187 | -2.4694716 |
| P  | -1.0235373 | 1.1903822  | 1.7595524  |
| N  | -0.4886962 | -1.5846068 | 2.1376814  |
| N  | 0.6006094  | -2.5269981 | -0.5146896 |
| C  | -1.4491594 | -1.1628481 | 3.0459427  |
| C  | -1.8670428 | 0.1896169  | 3.0201966  |
| C  | -2.4455165 | 0.1772235  | -3.9411906 |
| H  | -2.9944052 | -0.2149490 | -3.0797478 |
| C  | -1.0465282 | 0.1727795  | -3.9279513 |

|   |            |            |            |
|---|------------|------------|------------|
| C | 1.7056205  | -2.4693294 | 1.6331733  |
| H | 2.6668759  | -2.6795033 | 2.1040091  |
| C | -0.0016290 | -2.2933654 | -2.8430905 |
| C | 0.7137007  | -1.9738514 | 2.5086423  |
| C | 1.6341486  | -2.7907704 | 0.2663141  |
| C | 0.4036914  | -3.1022374 | -1.7484141 |
| C | -2.0902550 | -2.0348000 | 3.9413120  |
| H | -1.7987161 | -3.0874520 | 3.9437415  |
| C | -0.2725939 | -2.8621828 | -4.0909726 |
| H | -0.5856241 | -2.2198124 | -4.9178757 |
| C | -2.8725657 | 0.6410234  | 3.8777967  |
| H | -3.1839698 | 1.6882201  | 3.8437623  |
| C | -3.0855149 | -1.5740509 | 4.7933176  |
| H | -3.5677188 | -2.2720949 | 5.4836729  |
| C | 0.6094927  | 1.5520155  | 2.5012332  |
| C | 0.5007437  | -4.4919401 | -1.9722688 |
| H | 0.7656058  | -5.1382542 | -1.1334803 |
| C | 1.4782848  | 0.1815871  | -2.5247003 |
| C | -1.9207978 | 2.7814293  | 1.7311019  |
| C | -1.3568520 | 3.9960054  | 2.1297415  |
| H | -0.3389169 | 4.0230207  | 2.5235253  |
| C | -2.4415896 | 1.1905248  | -6.1299578 |
| H | -2.9857797 | 1.5897612  | -6.9899799 |
| C | -3.2240117 | 2.7763108  | 1.2149253  |
| H | -3.6709353 | 1.8344353  | 0.8819115  |
| C | -0.3526920 | 0.6912126  | -5.0257517 |
| H | 0.7399386  | 0.6985353  | -5.0251478 |
| C | -3.3867091 | 5.1623522  | 1.5305233  |
| H | -3.9580851 | 6.0911214  | 1.4536839  |
| C | -3.1401331 | 0.6765701  | -5.0389382 |

|   |            |            |            |
|---|------------|------------|------------|
| H | -4.2332192 | 0.6718159  | -5.0393597 |
| C | -2.0870645 | 5.1795775  | 2.0275685  |
| H | -1.6329665 | 6.1227827  | 2.3428249  |
| C | 2.5993181  | -0.5625676 | -2.8976955 |
| H | 2.4752137  | -1.5970461 | -3.2260927 |
| C | -1.0483572 | 1.1994731  | -6.1201441 |
| H | -0.4967632 | 1.6038740  | -6.9729911 |
| C | -3.4810005 | -0.2348048 | 4.7706537  |
| H | -4.2656905 | 0.1224596  | 5.4419220  |
| C | -3.9552777 | 3.9550006  | 1.1244823  |
| H | -4.9732338 | 3.9334855  | 0.7266361  |
| C | 1.1198679  | -1.8567403 | 3.9673304  |
| H | 0.8436125  | -0.8678256 | 4.3672564  |
| H | 2.2035622  | -1.9941185 | 4.0900731  |
| H | 0.6068415  | -2.6115089 | 4.5856658  |
| C | -0.1490189 | -4.2314980 | -4.2899555 |
| H | -0.3608127 | -4.6680136 | -5.2687952 |
| C | 1.6494429  | 1.5056447  | -2.1007999 |
| H | 0.7794658  | 2.0934264  | -1.7919118 |
| C | 2.8839957  | -3.4484402 | -0.3017404 |
| H | 2.8883563  | -4.5350588 | -0.1117493 |
| H | 3.7801380  | -3.0294019 | 0.1814570  |
| H | 2.9666295  | -3.2991431 | -1.3881761 |
| C | 0.2364145  | -5.0406177 | -3.2176248 |
| H | 0.3212425  | -6.1226060 | -3.3548676 |
| C | 1.7582743  | 1.3901949  | 1.7230236  |
| H | 1.6725184  | 1.0718690  | 0.6805859  |
| C | 2.9173830  | 2.0761235  | -2.0576571 |
| H | 3.0367820  | 3.1103247  | -1.7241322 |
| C | 3.0200434  | 1.6077784  | 2.2720927  |



|   |            |            |            |
|---|------------|------------|------------|
| H | 3.9088471  | 1.4671468  | 1.6519003  |
| C | 4.0330204  | 1.3238849  | -2.4253201 |
| H | 5.0314014  | 1.7672519  | -2.3824331 |
| C | 0.7413376  | 1.9242912  | 3.8442811  |
| H | -0.1502579 | 2.0261698  | 4.4690188  |
| C | 3.8709569  | 0.0060188  | -2.8447722 |
| H | 4.7418804  | -0.5888911 | -3.1323377 |
| C | 3.1422897  | 1.9879578  | 3.6055267  |
| H | 4.1319037  | 2.1533362  | 4.0399440  |
| C | 2.0006613  | 2.1465366  | 4.3919385  |
| H | 2.0939956  | 2.4347198  | 5.4423256  |

81

2 PNAcAg Triplet E(DFT)=-2520.1833300 ZPVE=0.6498092

|    |            |            |            |
|----|------------|------------|------------|
| Ag | -0.9446591 | -1.0080173 | 0.0105895  |
| P  | -0.5865100 | -0.6607657 | -2.3838312 |
| P  | -0.7619421 | 1.0222282  | 1.5862384  |
| N  | -0.9336638 | -1.7779004 | 2.1517062  |
| N  | 0.8263721  | -2.4511387 | -0.4930755 |
| C  | -1.8101656 | -1.0754459 | 2.9845291  |
| C  | -1.8460415 | 0.3376581  | 2.8835039  |
| C  | -2.8226397 | -0.7710859 | -4.0181483 |
| H  | -3.2186963 | -1.4250919 | -3.2354769 |
| C  | -1.5431767 | -0.2225318 | -3.8761978 |
| C  | 1.2941122  | -2.7551036 | 1.8910428  |
| H  | 2.1041610  | -3.1262547 | 2.5269676  |
| C  | 0.3074713  | -2.1815208 | -2.8316837 |
| C  | 0.2048310  | -2.3171790 | 2.6693999  |
| C  | 1.6609384  | -2.8412878 | 0.5169731  |
| C  | 0.8940163  | -2.9372078 | -1.7610952 |
| C  | -2.6872584 | -1.7070113 | 3.8757959  |

|   |            |            |            |
|---|------------|------------|------------|
| H | -2.6826004 | -2.7973015 | 3.9340506  |
| C | 0.3697867  | -2.6474883 | -4.1420555 |
| H | -0.0723564 | -2.0527264 | -4.9447797 |
| C | -2.7263686 | 1.0751873  | 3.6771714  |
| H | -2.7474753 | 2.1646245  | 3.5909485  |
| C | -3.5601537 | -0.9595325 | 4.6583677  |
| H | -4.2388306 | -1.4718782 | 5.3459823  |
| C | 0.9167743  | 0.9930773  | 2.3086699  |
| C | 1.4640586  | -4.1938855 | -2.1022339 |
| H | 1.8447626  | -4.8307096 | -1.3057673 |
| C | 0.6938495  | 0.6471109  | -2.2642518 |
| C | -1.1990160 | 2.7908443  | 1.4618412  |
| C | -0.3281794 | 3.8235424  | 1.8206082  |
| H | 0.6387799  | 3.5881332  | 2.2699474  |
| C | -3.0935174 | 0.3569402  | -6.1330365 |
| H | -3.6991288 | 0.5848918  | -7.0141981 |
| C | -2.4284660 | 3.1156062  | 0.8713309  |
| H | -3.1101706 | 2.3154074  | 0.5661537  |
| C | -1.0512555 | 0.6267788  | -4.8724023 |
| H | -0.0558003 | 1.0655262  | -4.7710772 |
| C | -1.9133591 | 5.4674703  | 1.0287397  |
| H | -2.1908072 | 6.5112415  | 0.8597992  |
| C | -3.5908589 | -0.4899308 | -5.1437186 |
| H | -4.5873116 | -0.9276853 | -5.2454411 |
| C | -0.6844765 | 5.1538911  | 1.6029853  |
| H | 0.0063957  | 5.9517210  | 1.8886182  |
| C | 2.0517362  | 0.3875937  | -2.4601520 |
| H | 2.3722301  | -0.6045476 | -2.7863159 |
| C | -1.8253320 | 0.9164358  | -5.9938120 |
| H | -1.4322984 | 1.5828836  | -6.7661900 |

|   |            |            |            |
|---|------------|------------|------------|
| C | -3.5805008 | 0.4324961  | 4.5687042  |
| H | -4.2667679 | 1.0161342  | 5.1871859  |
| C | -2.7878225 | 4.4430295  | 0.6654581  |
| H | -3.7524248 | 4.6803663  | 0.2091098  |
| C | 0.3783449  | -2.3607278 | 4.1721277  |
| H | 0.2419909  | -1.3613492 | 4.6218295  |
| H | 1.3845366  | -2.7133885 | 4.4427609  |
| H | -0.3529908 | -3.0279906 | 4.6623915  |
| C | 0.9715190  | -3.8676170 | -4.4483125 |
| H | 1.0087555  | -4.2185359 | -5.4820999 |
| C | 0.2983360  | 1.9199957  | -1.8309661 |
| H | -0.7590347 | 2.1297613  | -1.6467379 |
| C | 3.0900385  | -3.2632715 | 0.2395486  |
| H | 3.2659206  | -4.3570797 | 0.2371096  |
| H | 3.7631925  | -2.8376665 | 1.0046770  |
| H | 3.4261133  | -2.8851815 | -0.7398754 |
| C | 1.4992819  | -4.6417424 | -3.4112829 |
| H | 1.9394884  | -5.6189276 | -3.6300964 |
| C | 1.9922374  | 0.7170587  | 1.4586083  |
| H | 1.8155753  | 0.5411712  | 0.3950397  |
| C | 1.2414816  | 2.9159815  | -1.6050481 |
| H | 0.9157750  | 3.8987267  | -1.2547593 |
| C | 3.2868507  | 0.6413053  | 1.9648078  |
| H | 4.1172527  | 0.4181462  | 1.2900981  |
| C | 2.5969985  | 2.6475673  | -1.7977982 |
| H | 3.3419678  | 3.4239901  | -1.6052165 |
| C | 1.1536510  | 1.1864247  | 3.6734045  |
| H | 0.3155020  | 1.3873767  | 4.3461318  |
| C | 2.9984851  | 1.3851816  | -2.2262937 |
| H | 4.0596185  | 1.1690673  | -2.3765766 |

|   |           |           |           |
|---|-----------|-----------|-----------|
| C | 3.5158382 | 0.8325152 | 3.3254023 |
| H | 4.5310290 | 0.7627432 | 3.7255176 |
| C | 2.4479613 | 1.1069191 | 4.1794660 |
| H | 2.6240390 | 1.2519549 | 5.2486646 |

**PNacAuCu (3)**

83

3 PNacAuCuI Singlet E(DFT)=-4447.2902640 ZPVE=0.6560765

|    |            |            |            |
|----|------------|------------|------------|
| Au | 13.9465975 | 0.6008259  | 15.4521887 |
| I  | 16.7210152 | -0.5654832 | 13.9553992 |
| Cu | 14.5062413 | -0.0152135 | 12.8958512 |
| P  | 13.0108632 | -1.5174125 | 15.8929568 |
| P  | 14.4066598 | 2.8965223  | 15.1963546 |
| C  | 17.8873172 | 3.1796759  | 17.2889526 |
| H  | 18.8184004 | 2.6094491  | 17.3374844 |
| C  | 15.5057460 | 4.6233854  | 17.1585185 |
| H  | 14.5746986 | 5.1926195  | 17.1126452 |
| C  | 12.0073214 | 3.4887148  | 16.4885631 |
| H  | 12.1733347 | 2.5394698  | 17.0053322 |
| N  | 12.8560820 | -1.1367987 | 12.9190867 |
| N  | 13.6038651 | 1.7067538  | 12.4816415 |
| C  | 10.8820690 | 4.2535730  | 16.7808093 |
| H  | 10.1667311 | 3.9023854  | 17.5289909 |
| C  | 14.9884755 | 3.4206792  | 13.5524682 |
| C  | 13.2604183 | -2.8144078 | 14.6366313 |
| C  | 11.4252664 | 0.6851718  | 12.2526048 |
| H  | 10.3901491 | 0.9183570  | 12.0048024 |
| C  | 13.5528880 | -4.7705896 | 12.6705650 |
| H  | 13.6758722 | -5.5306188 | 11.8941904 |
| C  | 13.2422950 | -3.4666103 | 12.3095412 |
| H  | 13.1378043 | -3.1879123 | 11.2586815 |

C 15.6809629 3.4945828 16.3552211  
C 12.9321852 3.9240437 15.5334564  
C 14.4699476 2.7994503 12.3940962  
C 12.7127466 5.1369810 14.8737432  
H 13.4260908 5.4854708 14.1234276  
C 17.7112126 4.3083298 18.0893357  
H 18.5059775 4.6269490 18.7691208  
C 11.6723464 -0.6668110 12.5718667  
C 13.0837989 -2.4675421 13.2792836  
C 10.4882106 -1.6085579 12.5285537  
H 10.6214697 -2.3619400 11.7346414  
H 9.5512195 -1.0660211 12.3408283  
H 10.3912431 -2.1575883 13.4785488  
C 10.6660942 5.4587181 16.1146783  
H 9.7782797 6.0563948 16.3373169  
C 11.5829212 5.8990638 15.1628868  
H 11.4176966 6.8431097 14.6373776  
C 16.8763444 2.7675883 16.4279029  
H 17.0149491 1.8771233 15.8052016  
C 13.7228420 -5.1097390 14.0125355  
H 13.9787810 -6.1324555 14.2987656  
C 16.3651186 4.8792393 12.1844368  
H 17.1068341 5.6774685 12.1075947  
C 15.9343647 4.4462175 13.4315027  
H 16.3447791 4.9085953 14.3318940  
C 15.8540833 4.2705448 11.0377373  
H 16.1945801 4.5906087 10.0491883  
C 11.7123632 3.1239371 11.8502300  
H 11.9336605 3.8653128 12.6347048  
H 10.6219301 3.0573489 11.7314009

H 12.1425338 3.5106623 10.9122421  
C 12.3112364 1.7798693 12.2088269  
C 13.5800413 -4.1294543 14.9874463  
H 13.7282776 -4.3892376 16.0378108  
C 16.5204254 5.0267863 18.0249745  
H 16.3766861 5.9099037 18.6529911  
C 14.9271048 3.2443898 11.1433856  
H 14.5505766 2.7404335 10.2505196  
C 11.1935408 -1.4401916 16.0583744  
C 13.6729352 -2.2226956 17.4369468  
C 12.8854351 -2.5383615 18.5451253  
H 11.8032561 -2.3981515 18.5101676  
C 10.5353620 -0.2147451 15.9371045  
H 11.1158449 0.6954737 15.7700023  
C 10.4399698 -2.6099406 16.2191977  
H 10.9422979 -3.5790539 16.2787750  
C 9.1441891 -0.1545007 15.9895542  
H 8.6413628 0.8097903 15.8810599  
C 15.0639979 -2.3872574 17.5051420  
H 15.6888585 -2.1198525 16.6459675  
C 13.4799900 -3.0288596 19.7073425  
H 12.8567821 -3.2725563 20.5717408  
C 15.6496798 -2.8839392 18.6634915  
H 16.7340967 -3.0128159 18.7066464  
C 9.0522611 -2.5478966 16.2815443  
H 8.4723210 -3.4656238 16.4083370  
C 8.4022102 -1.3185112 16.1661617  
H 7.3106151 -1.2724575 16.2041340  
C 14.8588870 -3.2064592 19.7668588  
H 15.3223403 -3.5925072 20.6786212

3 PNAcAuCuI Triplet E(DFT)=-4447.2063707 ZPVE=0.6535198

|    |            |            |            |
|----|------------|------------|------------|
| Au | 13.9209648 | 0.6670778  | 15.8142956 |
| I  | 16.5880657 | -0.4008657 | 13.6279634 |
| Cu | 14.1835062 | 0.1700601  | 13.1403946 |
| P  | 13.0379095 | -1.5074684 | 16.0188518 |
| P  | 14.4804941 | 2.9151139  | 15.3756172 |
| C  | 18.0484817 | 3.2363792  | 17.3088899 |
| H  | 18.9546875 | 2.6302708  | 17.3853883 |
| C  | 15.7333824 | 4.7781158  | 17.1043301 |
| H  | 14.8291737 | 5.3860071  | 17.0264585 |
| C  | 12.1049339 | 3.6492602  | 16.6370773 |
| H  | 12.2406909 | 2.7287627  | 17.2122010 |
| N  | 12.6668241 | -0.9963402 | 13.1840706 |
| N  | 13.2255188 | 1.8235423  | 12.9241182 |
| C  | 10.9993512 | 4.4604257  | 16.8748591 |
| H  | 10.2723251 | 4.1767079  | 17.6400222 |
| C  | 15.0003191 | 3.2778868  | 13.6705779 |
| C  | 13.4375268 | -2.7006940 | 14.7030325 |
| C  | 11.2294766 | 0.6533473  | 12.1238478 |
| H  | 10.2419940 | 0.8049991  | 11.6815474 |
| C  | 13.7654388 | -4.5035703 | 12.6099130 |
| H  | 13.8999952 | -5.2083310 | 11.7846767 |
| C  | 13.2663499 | -3.2351182 | 12.3503101 |
| H  | 13.0333405 | -2.9282205 | 11.3288650 |
| C  | 15.8227886 | 3.5628701  | 16.4228767 |
| C  | 13.0400397 | 3.9984841  | 15.6579312 |
| C  | 14.2147155 | 2.7389872  | 12.6157597 |
| C  | 12.8521867 | 5.1673491  | 14.9149146 |
| H  | 13.5690851 | 5.4386114  | 14.1366677 |

|   |            |            |            |
|---|------------|------------|------------|
| C | 17.9559700 | 4.4504905  | 17.9896491 |
| H | 18.7907898 | 4.7982040  | 18.6038938 |
| C | 11.5081494 | -0.6609660 | 12.5042747 |
| C | 13.0966442 | -2.2994848 | 13.3866762 |
| C | 10.4519477 | -1.7209160 | 12.3480710 |
| H | 10.7487035 | -2.5344758 | 11.6614877 |
| H | 9.5200618  | -1.2813675 | 11.9616424 |
| H | 10.2279420 | -2.1982820 | 13.3194904 |
| C | 10.8167440 | 5.6244292  | 16.1307480 |
| H | 9.9443407  | 6.2580021  | 16.3110005 |
| C | 11.7438428 | 5.9762208  | 15.1520112 |
| H | 11.6005445 | 6.8847979  | 14.5616803 |
| C | 16.9850984 | 2.7885252  | 16.5332148 |
| H | 17.0585664 | 1.8353657  | 15.9992282 |
| C | 14.1215742 | -4.8765763 | 13.9069815 |
| H | 14.5261410 | -5.8716067 | 14.1059968 |
| C | 16.3702591 | 4.4864291  | 12.0837439 |
| H | 17.2118986 | 5.1513179  | 11.8773318 |
| C | 16.0731332 | 4.1246844  | 13.3951079 |
| H | 16.6797733 | 4.5184783  | 14.2131890 |
| C | 15.5834325 | 3.9930683  | 11.0403157 |
| H | 15.8144412 | 4.2684292  | 10.0074938 |
| C | 11.3881978 | 3.1538345  | 11.9486173 |
| H | 11.3460130 | 3.7865260  | 12.8562961 |
| H | 10.3627735 | 3.0353236  | 11.5663219 |
| H | 11.9607384 | 3.7280125  | 11.1975826 |
| C | 11.9930788 | 1.8128077  | 12.2683465 |
| C | 13.9572577 | -3.9705382 | 14.9507774 |
| H | 14.2237868 | -4.2651356 | 15.9677406 |
| C | 16.7987622 | 5.2177559  | 17.8885509 |



H 16.7216777 6.1683634 18.4226237  
C 14.5269228 3.1333686 11.2972158  
H 13.9407846 2.7099845 10.4790138  
C 11.2176287 -1.4813231 16.0101167  
C 13.5986444 -2.2871993 17.5692343  
C 12.7390671 -2.6905890 18.5921735  
H 11.6589528 -2.5821682 18.4782311  
C 10.5377404 -0.2802487 15.7987194  
H 11.0997103 0.6477271 15.6668748  
C 10.4935125 -2.6752378 16.1133101  
H 11.0201584 -3.6256340 16.2337864  
C 9.1482832 -0.2690547 15.7084080  
H 8.6279006 0.6739256 15.5244432  
C 14.9843354 -2.4109507 17.7460167  
H 15.6665452 -2.0771979 16.9571752  
C 13.2569230 -3.2265633 19.7710387  
H 12.5756879 -3.5376355 20.5672810  
C 15.4958087 -2.9546407 18.9182199  
H 16.5771966 -3.0521297 19.0429888  
C 9.1050731 -2.6598828 16.0370742  
H 8.5458033 -3.5953179 16.1191927  
C 8.4310637 -1.4555307 15.8340079  
H 7.3404273 -1.4463744 15.7597364  
C 14.6317161 -3.3645273 19.9340953  
H 15.0345239 -3.7869675 20.8583322

**PNacAuZn (4)**

84

4 PNacAuZnCl<sub>2</sub> Singlet E(DFT)=-5208.6509165 ZPVE=0.6584522

Au 3.7112247 14.4980744 18.8486778

Zn 1.4038993 12.5278315 20.0058754

|    |            |            |            |
|----|------------|------------|------------|
| Cl | 3.2578032  | 11.5845558 | 19.0423404 |
| Cl | -0.2149234 | 11.2967817 | 20.8740578 |
| P  | 2.7176689  | 14.6771447 | 16.7235203 |
| P  | 4.8920472  | 14.6322227 | 20.8787568 |
| N  | 0.6325215  | 13.9232026 | 18.7333355 |
| N  | 1.9432174  | 14.0048982 | 21.3105050 |
| C  | 3.9084818  | 14.2249276 | 15.4213159 |
| C  | 1.2453251  | 15.1235706 | 21.4221422 |
| C  | 1.2811876  | 13.5995522 | 16.4111018 |
| C  | 0.0851595  | 15.0435391 | 19.1711790 |
| C  | 4.1735256  | 13.6992914 | 22.2664878 |
| C  | 0.3715501  | 15.6046944 | 20.4298444 |
| H  | -0.1443479 | 16.5351494 | 20.6626584 |
| C  | -0.7126312 | 12.5238733 | 17.2672194 |
| H  | -1.3553704 | 12.3035641 | 18.1222411 |
| C  | 2.1117946  | 16.3575970 | 16.3522183 |
| C  | 1.0678619  | 12.9840297 | 15.1729271 |
| H  | 1.7809181  | 13.1366023 | 14.3594419 |
| C  | 6.5784537  | 13.9590436 | 20.7154286 |
| C  | 2.7788681  | 13.5247074 | 22.3313313 |
| C  | 0.3723545  | 13.3858216 | 17.4632942 |
| C  | -0.9172216 | 11.9244434 | 16.0309999 |
| H  | -1.7672789 | 11.2512246 | 15.8927034 |
| C  | -0.8903136 | 15.7798236 | 18.2838050 |
| H  | -0.4509289 | 15.9790315 | 17.2939202 |
| H  | -1.1957176 | 16.7357745 | 18.7311265 |
| H  | -1.7893223 | 15.1628407 | 18.1194665 |
| C  | 2.3558663  | 17.3960769 | 17.2537844 |
| H  | 2.9269256  | 17.1953545 | 18.1638141 |
| C  | -0.0336266 | 12.1591649 | 14.9772341 |

|   |            |            |            |
|---|------------|------------|------------|
| H | -0.1895245 | 11.6794411 | 14.0080334 |
| C | 4.4775845  | 12.9461991 | 15.5113808 |
| H | 4.1816826  | 12.2728560 | 16.3231514 |
| C | 1.4002884  | 15.9578674 | 22.6722643 |
| H | 1.0960999  | 15.3805422 | 23.5604046 |
| H | 0.7937773  | 16.8725742 | 22.6212294 |
| H | 2.4544193  | 16.2438084 | 22.8187610 |
| C | 9.1026713  | 12.8128638 | 20.4031093 |
| H | 10.0919014 | 12.3638930 | 20.2804899 |
| C | 4.3029487  | 15.0886560 | 14.3992098 |
| H | 3.8752865  | 16.0910685 | 14.3292760 |
| C | 7.7209605  | 14.6741741 | 21.0778700 |
| H | 7.6324410  | 15.6840767 | 21.4846089 |
| C | 4.9918143  | 13.1255980 | 23.2485016 |
| H | 6.0760063  | 13.2460481 | 23.1871331 |
| C | 2.2373032  | 12.7435815 | 23.3613322 |
| H | 1.1637607  | 12.5445680 | 23.3424177 |
| C | 8.9815190  | 14.0996806 | 20.9195126 |
| H | 9.8734095  | 14.6642859 | 21.2034909 |
| C | 5.1763891  | 16.6489290 | 22.8386761 |
| H | 5.0880386  | 15.8523806 | 23.5809998 |
| C | 5.1030004  | 16.3449343 | 21.4759815 |
| C | 6.7013548  | 12.6661026 | 20.1880168 |
| H | 5.8060015  | 12.1061016 | 19.8969087 |
| C | 4.4397842  | 12.3870129 | 24.2868085 |
| H | 5.0884296  | 11.9419558 | 25.0450077 |
| C | 7.9612748  | 12.0976930 | 20.0392536 |
| H | 8.0520100  | 11.0879332 | 19.6310471 |
| C | 1.0952272  | 18.9160348 | 15.8674885 |
| H | 0.6928528  | 19.9149979 | 15.6798847 |

|   |           |            |            |
|---|-----------|------------|------------|
| C | 0.8439006 | 17.8826975 | 14.9643371 |
| H | 0.2446963 | 18.0693757 | 14.0695759 |
| C | 5.4166034 | 12.5376815 | 14.5719676 |
| H | 5.8536635 | 11.5386364 | 14.6448117 |
| C | 1.3440269 | 16.6083357 | 15.2081048 |
| H | 1.1214564 | 15.7966253 | 14.5107425 |
| C | 5.2057221 | 17.3774557 | 20.5376747 |
| H | 5.1390408 | 17.1440067 | 19.4712967 |
| C | 5.8049513 | 13.4008246 | 13.5464350 |
| H | 6.5470121 | 13.0781075 | 12.8114110 |
| C | 3.0588328 | 12.1902640 | 24.3335407 |
| H | 2.6190039 | 11.5807530 | 25.1272775 |
| C | 5.2511024 | 14.6746463 | 13.4638015 |
| H | 5.5569494 | 15.3561159 | 12.6657240 |
| C | 5.3505991 | 17.9667567 | 23.2548134 |
| H | 5.4008545 | 18.1952937 | 24.3224244 |
| C | 1.8487033 | 18.6711496 | 17.0118207 |
| H | 2.0372230 | 19.4740142 | 17.7289275 |
| C | 5.4573107 | 18.9893139 | 22.3147260 |
| H | 5.5914511 | 20.0231490 | 22.6435464 |
| C | 5.3878368 | 18.6925854 | 20.9547443 |
| H | 5.4683450 | 19.4914139 | 20.2130820 |

84

4 PNAcAuZnCl<sub>2</sub> Triplet E(DFT)=-5208.5536873 ZPVE=0.6551558

|    |            |            |            |
|----|------------|------------|------------|
| Au | 3.7484540  | 14.4828742 | 18.8304851 |
| Zn | 1.4327252  | 12.5444695 | 20.0238552 |
| Cl | 3.2551834  | 11.5662690 | 19.0486250 |
| Cl | -0.1799224 | 11.3948601 | 20.9971022 |
| P  | 2.7101810  | 14.6801843 | 16.7277109 |
| P  | 4.9347724  | 14.5953293 | 20.8605348 |

|   |            |            |            |
|---|------------|------------|------------|
| N | 0.6121686  | 13.8624835 | 18.7185783 |
| N | 1.9941430  | 14.0432731 | 21.2996908 |
| C | 3.9077314  | 14.2642152 | 15.4189206 |
| C | 1.1933725  | 15.1373174 | 21.4607049 |
| C | 1.2933255  | 13.5823741 | 16.4011574 |
| C | 0.0161652  | 15.0142422 | 19.1382744 |
| C | 4.2032871  | 13.6889747 | 22.2554507 |
| C | 0.3175716  | 15.5411502 | 20.4179805 |
| H | -0.2377025 | 16.4550162 | 20.6504501 |
| C | -0.6918082 | 12.4635837 | 17.2266279 |
| H | -1.3408681 | 12.2289645 | 18.0729389 |
| C | 2.0898405  | 16.3594441 | 16.3819908 |
| C | 1.0949629  | 12.9829049 | 15.1521262 |
| H | 1.8089203  | 13.1602615 | 14.3445720 |
| C | 6.6140081  | 13.9057017 | 20.7026112 |
| C | 2.8029893  | 13.5739200 | 22.3388099 |
| C | 0.3823622  | 13.3345734 | 17.4439071 |
| C | -0.8796297 | 11.8807708 | 15.9802286 |
| H | -1.7200284 | 11.1991076 | 15.8251344 |
| C | -0.9830637 | 15.7123718 | 18.2568086 |
| H | -0.5585098 | 15.9658616 | 17.2690681 |
| H | -1.3278869 | 16.6496843 | 18.7198193 |
| H | -1.8724423 | 15.0831331 | 18.0663552 |
| C | 2.3777066  | 17.3984319 | 17.2701915 |
| H | 2.9828726  | 17.1958415 | 18.1579452 |
| C | 0.0077707  | 12.1445723 | 14.9364948 |
| H | -0.1350258 | 11.6786885 | 13.9586086 |
| C | 4.5082832  | 12.9992930 | 15.4984476 |
| H | 4.2324623  | 12.3139133 | 16.3071790 |
| C | 1.2710448  | 15.9529547 | 22.7222966 |

|   |            |            |            |
|---|------------|------------|------------|
| H | 0.9216934  | 15.3937810 | 23.6099990 |
| H | 0.6551754  | 16.8619230 | 22.6399264 |
| H | 2.3081603  | 16.2700944 | 22.9388174 |
| C | 9.1275468  | 12.7323898 | 20.4081463 |
| H | 10.1127260 | 12.2728138 | 20.2924032 |
| C | 4.2736632  | 15.1425059 | 14.3987439 |
| H | 3.8198207  | 16.1338793 | 14.3365432 |
| C | 7.7610966  | 14.6061480 | 21.0794316 |
| H | 7.6794621  | 15.6147005 | 21.4910894 |
| C | 5.0087712  | 13.1276938 | 23.2545602 |
| H | 6.0960308  | 13.2060107 | 23.1802991 |
| C | 2.2382674  | 12.8810076 | 23.4200112 |
| H | 1.1568859  | 12.7324744 | 23.4263064 |
| C | 9.0163528  | 14.0181661 | 20.9296864 |
| H | 9.9120044  | 14.5709329 | 21.2248728 |
| C | 5.1281938  | 16.6455165 | 22.7985777 |
| H | 4.9623090  | 15.8689092 | 23.5483194 |
| C | 5.1538873  | 16.3121272 | 21.4418051 |
| C | 6.7268177  | 12.6135551 | 20.1712111 |
| H | 5.8274018  | 12.0645698 | 19.8718178 |
| C | 4.4376221  | 12.4628719 | 24.3314142 |
| H | 5.0749574  | 12.0242214 | 25.1027694 |
| C | 7.9816024  | 12.0315056 | 20.0311675 |
| H | 8.0647880  | 11.0222818 | 19.6200308 |
| C | 1.0862663  | 18.9267067 | 15.9219989 |
| H | 0.6894466  | 19.9296635 | 15.7440684 |
| C | 0.7906486  | 17.8929200 | 15.0336575 |
| H | 0.1615381  | 18.0825208 | 14.1603326 |
| C | 5.4509729  | 12.6185886 | 14.5511384 |
| H | 5.9126306  | 11.6301000 | 14.6155756 |

|   |           |            |            |
|---|-----------|------------|------------|
| C | 1.2844962 | 16.6134857 | 15.2654241 |
| H | 1.0290500 | 15.8015553 | 14.5797102 |
| C | 5.3552152 | 17.3201067 | 20.4917841 |
| H | 5.3622785 | 17.0651245 | 19.4280161 |
| C | 5.8115001 | 13.4965470 | 13.5279580 |
| H | 6.5566513 | 13.1960252 | 12.7866945 |
| C | 3.0488181 | 12.3376118 | 24.4060463 |
| H | 2.5930443 | 11.7898573 | 25.2351200 |
| C | 5.2257818 | 14.7566446 | 13.4552914 |
| H | 5.5094360 | 15.4492578 | 12.6586302 |
| C | 5.3047540 | 17.9687827 | 23.1982805 |
| H | 5.2767581 | 18.2208878 | 24.2613822 |
| C | 1.8775778 | 18.6781035 | 17.0402309 |
| H | 2.1020601 | 19.4823697 | 17.7453487 |
| C | 5.5127145 | 18.9655743 | 22.2484522 |
| H | 5.6491647 | 20.0030790 | 22.5645492 |
| C | 5.5409854 | 18.6389364 | 20.8932198 |
| H | 5.7005280 | 19.4179307 | 20.1432482 |

### **PNacAuCd (5)**

84

5 PNacAuCdI2 Singlet E(DFT)=-3272.3459289 ZPVE=0.6566880

|    |           |            |           |
|----|-----------|------------|-----------|
| Au | 4.4700898 | 9.8562518  | 4.1820303 |
| I  | 1.2505612 | 9.3372942  | 4.2766376 |
| Cd | 1.8442384 | 12.0434748 | 4.1679878 |
| I  | 0.0435044 | 14.0570954 | 4.0307377 |
| P  | 4.8054180 | 9.9324602  | 6.5126012 |
| P  | 4.7969285 | 9.8149643  | 1.8505721 |
| N  | 3.5807945 | 12.4511320 | 2.7348344 |
| N  | 3.4412356 | 12.4465221 | 5.7413160 |
| C  | 4.4714709 | 13.3921601 | 3.0112036 |

|   |           |            |            |
|---|-----------|------------|------------|
| C | 4.3454089 | 13.3955369 | 5.5657483  |
| C | 4.8093357 | 13.8267327 | 4.3072747  |
| H | 5.5578075 | 14.6169200 | 4.3437728  |
| C | 3.0405057 | 12.0024546 | 7.0122029  |
| C | 3.2471390 | 12.0925726 | 1.4180576  |
| C | 2.3764172 | 12.8921885 | 0.6633198  |
| H | 2.0063180 | 13.8196598 | 1.1058542  |
| C | 3.6721986 | 10.8619408 | 0.8775151  |
| C | 3.5332197 | 10.7779304 | 7.5049920  |
| C | 2.0664990 | 12.6863075 | 7.7490630  |
| H | 1.6535723 | 13.6111616 | 7.3395811  |
| C | 1.9581589 | 12.4941668 | -0.5992669 |
| H | 1.2736209 | 13.1320048 | -1.1644145 |
| C | 1.6112788 | 12.1779908 | 8.9597893  |
| H | 0.8468147 | 12.7236988 | 9.5188971  |
| C | 4.9422335 | 14.0719512 | 6.7792922  |
| H | 4.1806128 | 14.6990494 | 7.2723939  |
| H | 5.7945159 | 14.7084744 | 6.5048590  |
| H | 5.2797148 | 13.3309136 | 7.5198979  |
| C | 6.4802347 | 10.3789139 | 1.4125551  |
| C | 5.2064579 | 14.0570501 | 1.8675379  |
| H | 5.6587247 | 13.3027830 | 1.2051697  |
| H | 6.0000234 | 14.7222998 | 2.2344500  |
| H | 4.5087375 | 14.6504110 | 1.2545639  |
| C | 4.6522824 | 8.1549521  | 1.1094743  |
| C | 6.3400876 | 10.8215698 | 6.9474816  |
| C | 4.9359333 | 8.2607040  | 7.2271560  |
| C | 6.6727420 | 11.0554824 | 8.2879629  |
| H | 6.0269265 | 10.6778453 | 9.0851466  |
| C | 6.7387714 | 11.0761378 | 0.2288143  |



|   |            |            |            |
|---|------------|------------|------------|
| H | 5.9201388  | 11.3114015 | -0.4551880 |
| C | 3.0662236  | 10.2748943 | 8.7227443  |
| H | 3.4439985  | 9.3214861  | 9.0984455  |
| C | 2.3877713  | 11.2801355 | -1.1352252 |
| H | 2.0490971  | 10.9591014 | -2.1229767 |
| C | 9.0847943  | 11.1882635 | 0.7904139  |
| H | 10.1012704 | 11.5099325 | 0.5492021  |
| C | 3.2354327  | 10.4677101 | -0.3932781 |
| H | 3.5570578  | 9.5066126  | -0.8005698 |
| C | 2.1110451  | 10.9733646 | 9.4527987  |
| H | 1.7463146  | 10.5696554 | 10.4001855 |
| C | 7.5390017  | 10.0860983 | 2.2787674  |
| H | 7.3428115  | 9.5397801  | 3.2052335  |
| C | 7.1519727  | 11.3460658 | 5.9400911  |
| H | 6.8756930  | 11.2023286 | 4.8933887  |
| C | 8.2892770  | 12.0829716 | 6.2648354  |
| H | 8.9096833  | 12.4970106 | 5.4659932  |
| C | 7.8120401  | 11.7838566 | 8.6112304  |
| H | 8.0643790  | 11.9613136 | 9.6597205  |
| C | 8.6223666  | 12.2991376 | 7.5985143  |
| H | 9.5122737  | 12.8802760 | 7.8542062  |
| C | 8.0360210  | 11.4805101 | -0.0785250 |
| H | 8.2267912  | 12.0306046 | -1.0034851 |
| C | 4.3159357  | 5.6050056  | 0.0218282  |
| H | 4.1848151  | 4.6066300  | -0.4037811 |
| C | 8.8352875  | 10.4858394 | 1.9682205  |
| H | 9.6538840  | 10.2517709 | 2.6536945  |
| C | 3.8285527  | 7.4145133  | 7.0734369  |
| H | 2.9278833  | 7.7792722  | 6.5696996  |
| C | 5.0269624  | 5.6343806  | 8.1784706  |

|   |           |           |            |
|---|-----------|-----------|------------|
| H | 5.0625946 | 4.6076917 | 8.5521051  |
| C | 3.5126987 | 7.4019672 | 1.4194514  |
| H | 2.7526879 | 7.8113712 | 2.0918229  |
| C | 6.1336956 | 6.4661554 | 8.3183459  |
| H | 7.0422107 | 6.0954172 | 8.7999833  |
| C | 5.4539829 | 6.3474730 | -0.2810678 |
| H | 6.2188568 | 5.9349632 | -0.9440916 |
| C | 6.0907568 | 7.7769726 | 7.8447197  |
| H | 6.9665036 | 8.4191731 | 7.9558931  |
| C | 5.6234784 | 7.6210657 | 0.2592410  |
| H | 6.5188680 | 8.1968084 | 0.0155869  |
| C | 3.3456059 | 6.1348846 | 0.8719108  |
| H | 2.4516931 | 5.5556980 | 1.1164386  |
| C | 3.8741677 | 6.1112556 | 7.5540484  |
| H | 3.0043391 | 5.4607710 | 7.4330975  |

84

5 PNaAuCdI<sub>2</sub> Triplet E(DFT)=-3272.2492061 ZPVE=0.6534610

|    |           |            |           |
|----|-----------|------------|-----------|
| Au | 4.4402369 | 9.7837486  | 4.1807226 |
| I  | 1.2339096 | 9.3045750  | 4.2884774 |
| Cd | 1.8814044 | 11.9967689 | 4.1461646 |
| I  | 0.1158291 | 14.0222947 | 3.8842912 |
| P  | 4.7928849 | 9.9297527  | 6.5061404 |
| P  | 4.7587765 | 9.7522255  | 1.8467218 |
| N  | 3.6445262 | 12.4112146 | 2.7313116 |
| N  | 3.3800767 | 12.4486839 | 5.7812486 |
| C  | 4.4790407 | 13.4556537 | 3.0131280 |
| C  | 4.2912506 | 13.4505920 | 5.6366912 |
| C  | 4.7298712 | 13.8629861 | 4.3534387 |
| H  | 5.4485263 | 14.6861115 | 4.4074043 |
| C  | 3.0047547 | 11.9777694 | 7.0455525 |

|   |           |            |            |
|---|-----------|------------|------------|
| C | 3.3103240 | 12.0894678 | 1.4133278  |
| C | 2.5309971 | 12.9564788 | 0.6291919  |
| H | 2.2200098 | 13.9105086 | 1.0588406  |
| C | 3.6619248 | 10.8303888 | 0.8807350  |
| C | 3.5187110 | 10.7523188 | 7.5143626  |
| C | 2.0467169 | 12.6510291 | 7.8137896  |
| H | 1.6247922 | 13.5801835 | 7.4244820  |
| C | 2.1113535 | 12.5809125 | -0.6386117 |
| H | 1.4897165 | 13.2652994 | -1.2218357 |
| C | 1.6196319 | 12.1255284 | 9.0268202  |
| H | 0.8651300 | 12.6608489 | 9.6090634  |
| C | 4.8522744 | 14.1371638 | 6.8539064  |
| H | 4.0768110 | 14.6998657 | 7.4059707  |
| H | 5.6462484 | 14.8466894 | 6.5756925  |
| H | 5.2858762 | 13.4141677 | 7.5669834  |
| C | 6.4514332 | 10.3080677 | 1.4346169  |
| C | 5.1950090 | 14.1757990 | 1.9000474  |
| H | 5.6892640 | 13.4642500 | 1.2145876  |
| H | 5.9720961 | 14.8441547 | 2.3022567  |
| H | 4.5191878 | 14.7930239 | 1.2795333  |
| C | 4.6005111 | 8.1038900  | 1.0858744  |
| C | 6.3200189 | 10.8468629 | 6.9038214  |
| C | 4.9678483 | 8.2639111  | 7.2258565  |
| C | 6.6602010 | 11.1257336 | 8.2330772  |
| H | 6.0171345 | 10.7783517 | 9.0461047  |
| C | 6.7193457 | 11.0889800 | 0.3073196  |
| H | 5.9038439 | 11.3900857 | -0.3538006 |
| C | 3.0790029 | 10.2335040 | 8.7361912  |
| H | 3.4722401 | 9.2799403  | 9.0949394  |
| C | 2.4553260 | 11.3323259 | -1.1595610 |

|   |            |            |            |
|---|------------|------------|------------|
| H | 2.1137358  | 11.0328469 | -2.1529838 |
| C | 9.0687483  | 11.1155196 | 0.8673734  |
| H | 10.0904612 | 11.4360535 | 0.6476418  |
| C | 3.2268523  | 10.4639344 | -0.3982836 |
| H | 3.4954566  | 9.4842854  | -0.7997475 |
| C | 2.1347462  | 10.9168005 | 9.4937060  |
| H | 1.7921566  | 10.4994678 | 10.4434025 |
| C | 7.5065790  | 9.9326019  | 2.2740364  |
| H | 7.3026167  | 9.3246291  | 3.1599125  |
| C | 7.1280985  | 11.3328207 | 5.8738078  |
| H | 6.8487314  | 11.1475213 | 4.8337362  |
| C | 8.2707062  | 12.0740217 | 6.1665483  |
| H | 8.8906221  | 12.4545031 | 5.3507464  |
| C | 7.8054083  | 11.8591166 | 8.5248603  |
| H | 8.0641030  | 12.0718853 | 9.5651623  |
| C | 8.6121013  | 12.3345562 | 7.4908325  |
| H | 9.5066988  | 12.9190645 | 7.7212922  |
| C | 8.0238028  | 11.4920975 | 0.0276243  |
| H | 8.2221951  | 12.1084763 | -0.8528554 |
| C | 4.2426624  | 5.5753693  | -0.0427949 |
| H | 4.1031528  | 4.5851559  | -0.4845017 |
| C | 8.8089981  | 10.3302875 | 1.9900493  |
| H | 9.6246734  | 10.0305736 | 2.6531082  |
| C | 3.8877177  | 7.3847019  | 7.0631696  |
| H | 2.9829354  | 7.7206033  | 6.5467547  |
| C | 5.1232452  | 5.6475402  | 8.1950389  |
| H | 5.1841854  | 4.6245761  | 8.5755300  |
| C | 3.4671713  | 7.3452203  | 1.4041532  |
| H | 2.7202436  | 7.7426815  | 2.0980085  |
| C | 6.2031097  | 6.5123783  | 8.3440949  |

|   |           |           |            |
|---|-----------|-----------|------------|
| H | 7.1155969 | 6.1713993 | 8.8399665  |
| C | 5.3744333 | 6.3240250 | -0.3547723 |
| H | 6.1254617 | 5.9244842 | -1.0411421 |
| C | 6.1280339 | 7.8186276 | 7.8617626  |
| H | 6.9825435 | 8.4874685 | 7.9806789  |
| C | 5.5545109 | 7.5871332 | 0.2058217  |
| H | 6.4439688 | 8.1691770 | -0.0450246 |
| C | 3.2892791 | 6.0884716 | 0.8361218  |
| H | 2.4003002 | 5.5043524 | 1.0868097  |
| C | 3.9650438 | 6.0863670 | 7.5528581  |
| H | 3.1162948 | 5.4098458 | 7.4252601  |

### **PNacAuHg (6)**

84

6 PNacAuHgCl<sub>2</sub> Singlet E(DFT)=-3582.7344376 ZPVE=0.6567967

|    |           |            |            |
|----|-----------|------------|------------|
| Au | 3.4566680 | 8.4309196  | 14.7220908 |
| Hg | 2.4078257 | 10.8359021 | 12.3838579 |
| Cl | 3.4277676 | 8.6881982  | 11.6978285 |
| P  | 5.6028119 | 9.3295384  | 15.0518844 |
| P  | 1.4010409 | 7.2937397  | 14.8073354 |
| Cl | 1.6408911 | 12.9256401 | 11.4935484 |
| N  | 0.8976105 | 10.1147961 | 14.1086004 |
| N  | 3.5592270 | 11.4479435 | 14.4298035 |
| C  | 5.9286484 | 10.9205909 | 14.2390628 |
| C  | 6.9308771 | 8.2334183  | 14.4546999 |
| C  | 5.1019774 | 13.0414002 | 13.4212092 |
| H  | 4.2562326 | 13.7064203 | 13.2320239 |
| C  | 4.8581393 | 11.8224652 | 14.0759656 |
| C  | 2.1556387 | 5.2236160  | 13.1598092 |
| H  | 2.4279357 | 6.0323351  | 12.4732901 |
| C  | 5.9482151 | 9.5992125  | 16.8257486 |

|   |            |            |            |
|---|------------|------------|------------|
| C | -0.0439909 | 9.2634003  | 13.5229098 |
| C | 1.5979199  | 5.5263986  | 14.4104330 |
| C | 8.0226965  | 7.8633784  | 15.2419706 |
| H | 8.1096881  | 8.2281034  | 16.2679872 |
| C | 0.0929224  | 7.8705351  | 13.6813789 |
| C | 6.3757283  | 13.3655733 | 12.9767650 |
| H | 6.5402236  | 14.3179276 | 12.4656322 |
| C | 7.2072952  | 11.2555811 | 13.7755851 |
| H | 8.0279470  | 10.5438486 | 13.8929552 |
| C | 2.0347262  | 2.8681158  | 13.6749161 |
| H | 2.2048304  | 1.8272959  | 13.3871355 |
| C | -1.8980768 | 8.8749958  | 12.0107946 |
| H | -2.6686976 | 9.2733148  | 11.3454216 |
| C | 2.9241239  | 11.9601249 | 15.4688929 |
| C | 6.8239929  | 7.7556172  | 13.1416033 |
| H | 5.9644768  | 8.0374105  | 12.5240067 |
| C | -0.7697866 | 6.9983689  | 13.0104139 |
| H | -0.6505313 | 5.9187734  | 13.1275189 |
| C | 1.5918239  | 11.6680708 | 15.8207064 |
| H | 1.2304294  | 12.1740954 | 16.7150473 |
| C | 2.3650326  | 3.8991866  | 12.7945485 |
| H | 2.7963916  | 3.6702722  | 11.8168001 |
| C | -1.0421017 | 9.7502145  | 12.6670048 |
| H | -1.1101988 | 10.8289122 | 12.5060498 |
| C | 1.2747614  | 4.4936912  | 15.2913198 |
| H | 0.8531116  | 4.7191961  | 16.2730543 |
| C | 0.6542962  | 10.8240061 | 15.1961800 |
| C | 7.4376073  | 12.4766413 | 13.1561888 |
| H | 8.4376248  | 12.7273603 | 12.7948595 |
| C | 0.6298132  | 7.4023836  | 16.4583748 |

|   |            |            |            |
|---|------------|------------|------------|
| C | 6.7158781  | 10.6777379 | 17.2738828 |
| H | 7.1194035  | 11.3951343 | 16.5557677 |
| C | -1.7684785 | 7.4961343  | 12.1814894 |
| H | -2.4355975 | 6.8086481  | 11.6562608 |
| C | 3.6712761  | 12.9094869 | 16.3833682 |
| H | 3.0756330  | 13.1643503 | 17.2709135 |
| H | 3.9235730  | 13.8418331 | 15.8527124 |
| H | 4.6210867  | 12.4591152 | 16.7147497 |
| C | 6.4460334  | 9.9388085  | 19.5571463 |
| H | 6.6373427  | 10.0747974 | 20.6247877 |
| C | -0.5826298 | 7.6924436  | 18.9606503 |
| H | -1.0594825 | 7.8101711  | 19.9372925 |
| C | 7.8117740  | 6.9246532  | 12.6249461 |
| H | 7.7252141  | 6.5572597  | 11.5992652 |
| C | 1.4945077  | 3.1668389  | 14.9219651 |
| H | 1.2402466  | 2.3627404  | 15.6174348 |
| C | -0.6699535 | 6.9274222  | 16.6739145 |
| H | -1.2236564 | 6.4609260  | 15.8549253 |
| C | 8.9027492  | 6.5565180  | 13.4126175 |
| H | 9.6749528  | 5.8988432  | 13.0047504 |
| C | -0.7087496 | 10.7182997 | 15.8467517 |
| H | -1.4817900 | 11.1453717 | 15.1866546 |
| H | -0.7370978 | 11.2500552 | 16.8079059 |
| H | -0.9785658 | 9.6644415  | 16.0202678 |
| C | 5.4304067  | 8.6930738  | 17.7581908 |
| H | 4.8216069  | 7.8527379  | 17.4128528 |
| C | -1.2699161 | 7.0655810  | 17.9206956 |
| H | -2.2848521 | 6.6925858  | 18.0798474 |
| C | 1.3097070  | 8.0328434  | 17.5029432 |
| H | 2.3103694  | 8.4365996  | 17.3299147 |

C 9.0057577 7.0240253 14.7197346  
H 9.8576590 6.7356444 15.3410235  
C 6.9609174 10.8467683 18.6351137  
H 7.5573677 11.6967634 18.9762169  
C 0.7046280 8.1776631 18.7497527  
H 1.2424578 8.6826757 19.5560168  
C 5.6827913 8.8586797 19.1163543  
H 5.2743534 8.1440280 19.8355197

84

6 PNAcAuHgCl<sub>2</sub> Triplet E(DFT)=-3582.6385375 ZPVE=0.6539473

Au 3.4506357 8.4630519 14.7011596  
Hg 2.4007174 10.9121958 12.3894466  
Cl 3.3119766 8.5647967 11.7666191  
P 5.6329589 9.2706505 14.9983726  
P 1.3494536 7.4345025 14.8780593  
Cl 3.0108348 12.7742634 11.0399244  
N 0.7841809 10.2713208 13.7681938  
N 3.5685341 11.3905676 14.5820443  
C 5.9230448 10.9157767 14.2951285  
C 6.9339598 8.2149216 14.2880115  
C 5.0924188 13.1399296 13.8155341  
H 4.2556448 13.8341830 13.7353860  
C 4.8467262 11.8318202 14.2731590  
C 2.1455218 5.2883656 13.3407197  
H 2.4127521 6.0634174 12.6140343  
C 6.0286281 9.4333992 16.7758704  
C -0.0527693 9.2636865 13.2595879  
C 1.5707143 5.6489706 14.5685331  
C 8.0873131 7.8604510 14.9915426  
H 8.2331273 8.2056386 16.0178334



|   |            |            |            |
|---|------------|------------|------------|
| C | 0.0585727  | 7.9226759  | 13.6806153 |
| C | 6.3561355  | 13.5141925 | 13.3873793 |
| H | 6.5139784  | 14.5276195 | 13.0093141 |
| C | 7.1920345  | 11.3090508 | 13.8593746 |
| H | 8.0138515  | 10.5890945 | 13.8736693 |
| C | 2.0552972  | 2.9621222  | 13.9834722 |
| H | 2.2444795  | 1.9100361  | 13.7544146 |
| C | -1.8135725 | 8.6168587  | 11.7182305 |
| H | -2.5337798 | 8.8944532  | 10.9442656 |
| C | 2.7992429  | 12.0132967 | 15.5211297 |
| C | 6.7491669  | 7.7639923  | 12.9741446 |
| H | 5.8403462  | 8.0307916  | 12.4229772 |
| C | -0.7854024 | 6.9565593  | 13.1198864 |
| H | -0.6896256 | 5.9129263  | 13.4266378 |
| C | 1.4524063  | 11.6529165 | 15.6902464 |
| H | 0.9937894  | 12.1270246 | 16.5634376 |
| C | 2.3786870  | 3.9494054  | 13.0515089 |
| H | 2.8240280  | 3.6749500  | 12.0919154 |
| C | -0.9809714 | 9.5857951  | 12.2623540 |
| H | -1.0355912 | 10.6234379 | 11.9255723 |
| C | 1.2546738  | 4.6610813  | 15.5016484 |
| H | 0.8200625  | 4.9323598  | 16.4658688 |
| C | 0.5370707  | 10.7953107 | 15.0069602 |
| C | 7.4145258  | 12.6033434 | 13.4064115 |
| H | 8.4064860  | 12.8990403 | 13.0573523 |
| C | 0.5873179  | 7.5844249  | 16.5274757 |
| C | 6.7052329  | 10.5418995 | 17.2907610 |
| H | 7.0209141  | 11.3467113 | 16.6234859 |
| C | -1.7250231 | 7.2966583  | 12.1540016 |
| H | -2.3722459 | 6.5265014  | 11.7280348 |

|   |            |            |            |
|---|------------|------------|------------|
| C | 3.4225853  | 12.9855530 | 16.4934723 |
| H | 2.7420475  | 13.1854085 | 17.3359484 |
| H | 3.6765557  | 13.9586320 | 16.0373748 |
| H | 4.3631699  | 12.5761698 | 16.9059845 |
| C | 6.5705399  | 9.6081439  | 19.5145088 |
| H | 6.7799100  | 9.6787215  | 20.5851267 |
| C | -0.5593702 | 7.8761762  | 19.0590819 |
| H | -1.0098295 | 7.9933416  | 20.0482691 |
| C | 7.7233644  | 6.9737629  | 12.3732069 |
| H | 7.5768876  | 6.6264776  | 11.3473431 |
| C | 1.4979236  | 3.3193853  | 15.2071031 |
| H | 1.2487385  | 2.5505391  | 15.9431350 |
| C | -0.7175899 | 7.1386574  | 16.7672616 |
| H | -1.2989028 | 6.6877689  | 15.9586969 |
| C | 8.8752914  | 6.6211282  | 13.0760255 |
| H | 9.6359418  | 5.9956655  | 12.6011301 |
| C | -0.8408364 | 10.6230257 | 15.5975497 |
| H | -1.6129734 | 11.0874410 | 14.9538588 |
| H | -0.9017993 | 11.0894617 | 16.5923678 |
| H | -1.1285017 | 9.5660661  | 15.7178800 |
| C | 5.6190633  | 8.4154268  | 17.6457997 |
| H | 5.0718517  | 7.5546150  | 17.2504527 |
| C | -1.2863519 | 7.2802522  | 18.0290287 |
| H | -2.3064920 | 6.9311038  | 18.2076860 |
| C | 1.3087181  | 8.1839383  | 17.5628831 |
| H | 2.3203485  | 8.5525772  | 17.3710459 |
| C | 9.0551872  | 7.0624360  | 14.3844489 |
| H | 9.9555492  | 6.7856561  | 14.9391408 |
| C | 6.9717748  | 10.6282947 | 18.6564702 |
| H | 7.4965114  | 11.5024108 | 19.0505008 |

|   |           |           |            |
|---|-----------|-----------|------------|
| C | 0.7369809 | 8.3281449 | 18.8248647 |
| H | 1.3080681 | 8.8029842 | 19.6266427 |
| C | 5.8955732 | 8.4984599 | 19.0061935 |
| H | 5.5741132 | 7.6963649 | 19.6756211 |

### **PNacAgZn (7)**

84

7 PNacAgZnCl<sub>2</sub> Singlet E(DFT)=-5219.8868958 ZPVE=0.6579637

|    |            |            |            |
|----|------------|------------|------------|
| Ag | -0.3423278 | -0.7059149 | 0.2325867  |
| Zn | 2.4207327  | -1.9952821 | -0.0969673 |
| P  | -1.1140555 | -0.7843566 | -2.0706089 |
| Cl | 0.5547771  | -3.1924064 | 0.5613534  |
| P  | -0.0408334 | 0.2846889  | 2.4272177  |
| Cl | 4.3891321  | -2.9448985 | -0.3675886 |
| N  | 1.8929777  | -0.8348824 | -1.6980664 |
| N  | 2.5323739  | -0.3346598 | 1.0877056  |
| C  | -1.8776751 | 1.8865835  | -2.1135126 |
| H  | -2.0550043 | 1.7356939  | -1.0447995 |
| C  | -1.4068678 | 0.8231252  | -2.8906999 |
| C  | -0.3272734 | -2.4765995 | -4.1948911 |
| H  | -1.3905570 | -2.5567111 | -4.4332320 |
| C  | 0.0830053  | -1.6679420 | -3.1275430 |
| C  | 2.5746632  | -0.6194281 | 2.4668832  |
| C  | 1.4509746  | -1.5828542 | -2.8081659 |
| C  | 0.2329084  | 2.0906987  | 2.4339186  |
| C  | -2.6644929 | -1.7210920 | -2.3031500 |
| C  | 1.4368047  | -0.3915675 | 3.2636441  |
| C  | 2.9919289  | 0.8042301  | 0.5922905  |
| C  | 2.4091725  | 0.3790541  | -1.8373575 |
| C  | 2.9274080  | 1.1378894  | -0.7732678 |
| H  | 3.3335850  | 2.1121765  | -1.0407255 |

|   |            |            |            |
|---|------------|------------|------------|
| C | 1.4649768  | -0.7294418 | 4.6201421  |
| H | 0.5807271  | -0.5630399 | 5.2398411  |
| C | -1.4050913 | -0.0483131 | 3.5928828  |
| C | 1.9522456  | -3.1333925 | -4.5996902 |
| H | 2.6853252  | -3.7219136 | -5.1575211 |
| C | 3.7016051  | -1.2247227 | 3.0313113  |
| H | 4.5425006  | -1.4633311 | 2.3760243  |
| C | 0.6003318  | -3.1952116 | -4.9387467 |
| H | 0.2659789  | -3.8239480 | -5.7674842 |
| C | 2.4475485  | 1.0057062  | -3.2111972 |
| H | 3.0772175  | 0.4064244  | -3.8886526 |
| H | 2.8458809  | 2.0288648  | -3.1722334 |
| H | 1.4390673  | 1.0380602  | -3.6523894 |
| C | 2.3733750  | -2.3423377 | -3.5391087 |
| H | 3.4182585  | -2.3276253 | -3.2211563 |
| C | 2.6034680  | -1.2975123 | 5.1818982  |
| H | 2.6139328  | -1.5606396 | 6.2424220  |
| C | -1.1775857 | 1.0253772  | -4.2551375 |
| H | -0.8035574 | 0.2041865  | -4.8713829 |
| C | -3.7419158 | -1.2541373 | -3.0581723 |
| H | -3.6832080 | -0.2843812 | -3.5575864 |
| C | 3.7164409  | -1.5538893 | 4.3815762  |
| H | 4.6027883  | -2.0279168 | 4.8112343  |
| C | -2.1277698 | 0.9436277  | 4.2578268  |
| H | -1.8659540 | 1.9955629  | 4.1276528  |
| C | 3.6255602  | 1.8108078  | 1.5217295  |
| H | 2.9758350  | 2.0217081  | 2.3841766  |
| H | 3.8392770  | 2.7550383  | 1.0023731  |
| H | 4.5701199  | 1.4046017  | 1.9207932  |
| C | -4.8983526 | -2.0242270 | -3.1771764 |

|   |            |            |            |
|---|------------|------------|------------|
| H | -5.7384613 | -1.6512354 | -3.7689050 |
| C | 0.1224694  | 2.7933056  | 1.2321461  |
| H | -0.1471552 | 2.2592111  | 0.3175303  |
| C | -2.1205897 | 3.1304888  | -2.6893402 |
| H | -2.4892828 | 3.9529309  | -2.0708519 |
| C | -2.7563074 | -2.9637450 | -1.6607898 |
| H | -1.9172716 | -3.3315763 | -1.0606630 |
| C | -1.7717391 | -1.3922670 | 3.7565171  |
| H | -1.2234929 | -2.1752422 | 3.2220018  |
| C | -3.5409365 | -0.7389116 | 5.2621883  |
| H | -4.3747907 | -1.0081166 | 5.9157686  |
| C | -2.8273611 | -1.7341020 | 4.5931944  |
| H | -3.1004404 | -2.7849831 | 4.7178934  |
| C | -4.9819759 | -3.2626150 | -2.5473803 |
| H | -5.8889339 | -3.8654121 | -2.6431602 |
| C | -3.9080815 | -3.7315541 | -1.7902117 |
| H | -3.9695051 | -4.7017471 | -1.2907314 |
| C | 0.6285057  | 2.7727786  | 3.5913794  |
| H | 0.7501541  | 2.2270867  | 4.5309973  |
| C | -1.8845109 | 3.3256003  | -4.0488457 |
| H | -2.0660973 | 4.3038675  | -4.5015777 |
| C | 0.3901616  | 4.1601951  | 1.1859601  |
| H | 0.3100248  | 4.6952266  | 0.2362866  |
| C | 0.7699601  | 4.8336605  | 2.3431493  |
| H | 0.9845816  | 5.9050290  | 2.3083691  |
| C | 0.8888782  | 4.1380916  | 3.5473108  |
| H | 1.1977489  | 4.6626197  | 4.4551421  |
| C | -3.1930165 | 0.5970115  | 5.0890616  |
| H | -3.7532808 | 1.3814697  | 5.6045612  |
| C | -1.4136247 | 2.2719974  | -4.8299319 |

H -1.2260126 2.4214063 -5.8963414

84

7 PNAcAgZnCl<sub>2</sub> Triplet E(DFT)=-5219.7895513 ZPVE=0.6548072

Ag -0.4075945 -0.8693497 0.2827272

Zn 2.4295965 -2.0014272 -0.1215357

P -1.1677809 -0.8830677 -2.0286914

Cl 0.6199812 -3.2919665 0.5165337

P -0.0073974 0.2465048 2.4014698

Cl 4.4114516 -2.8568786 -0.5338696

N 1.8324036 -0.7861009 -1.6579424

N 2.5895901 -0.4506776 1.1738933

C -2.1046268 1.7286507 -1.9231382

H -2.3200784 1.4889118 -0.8776862

C -1.5316314 0.7564456 -2.7505634

C -0.2916560 -2.3923201 -4.2523183

H -1.3495463 -2.5281683 -4.4893408

C 0.0735524 -1.6394800 -3.1291384

C 2.5696685 -0.7433923 2.5461323

C 1.4357690 -1.4804805 -2.8133802

C 0.3376678 2.0342110 2.2713254

C -2.6705680 -1.8769769 -2.3223927

C 1.4189457 -0.4520572 3.3035822

C 3.0980146 0.7350382 0.7276275

C 2.3823663 0.4621437 -1.7654988

C 2.9596619 1.0974944 -0.6337417

H 3.3796664 2.0818321 -0.8610365

C 1.3918614 -0.7699840 4.6647744

H 0.4987545 -0.5539754 5.2555839

C -1.4050928 0.0724933 3.5645044

C 2.0247334 -2.8363854 -4.7308760

H 2.7912561 -3.3203455 -5.3418409  
C 3.6526307 -1.3869878 3.1517228  
H 4.5060012 -1.6586169 2.5261787  
C 0.6754544 -2.9801277 -5.0575006  
H 0.3768847 -3.5678105 -5.9288949  
C 2.4069011 1.1683954 -3.0941851  
H 3.0414466 0.6488985 -3.8358638  
H 2.7936018 2.1933389 -2.9845921  
H 1.3979980 1.2392821 -3.5380620  
C 2.4030986 -2.0986520 -3.6179115  
H 3.4490297 -2.0249052 -3.3132742  
C 2.4869255 -1.3800962 5.2679818  
H 2.4545315 -1.6263365 6.3320728  
C -1.2504165 1.0746079 -4.0823726  
H -0.7966047 0.3263381 -4.7363232  
C -3.7606352 -1.4233182 -3.0674603  
H -3.7415134 -0.4279776 -3.5172880  
C 3.6107863 -1.6978438 4.5059291  
H 4.4621776 -2.2027263 4.9698251  
C -2.0439580 1.1451727 4.1889406  
H -1.6953275 2.1659231 4.0208575  
C 3.8211705 1.6544666 1.6716125  
H 3.2153289 1.8960604 2.5617746  
H 4.0769213 2.6036435 1.1762457  
H 4.7603430 1.2015518 2.0410077  
C -4.8775667 -2.2399352 -3.2402178  
H -5.7279259 -1.8776941 -3.8239148  
C 0.1869253 2.6596132 1.0313047  
H -0.1317980 2.0736030 0.1650772  
C -2.3973811 2.9959090 -2.4184236

H -2.8449777 3.7460013 -1.7612702  
C -2.7097426 -3.1535989 -1.7447379  
H -1.8600742 -3.5115857 -1.1537016  
C -1.8832353 -1.2285152 3.7781023  
H -1.4007607 -2.0744987 3.2773361  
C -3.5939590 -0.3749171 5.2496117  
H -4.4485321 -0.5487644 5.9086945  
C -2.9644794 -1.4506577 4.6224145  
H -3.3238585 -2.4697975 4.7856260  
C -4.9087745 -3.5113906 -2.6745045  
H -5.7847821 -4.1506286 -2.8126468  
C -3.8220759 -3.9674010 -1.9278364  
H -3.8425296 -4.9637792 -1.4791253  
C 0.7927185 2.7806354 3.3641327  
H 0.9439555 2.2939780 4.3316176  
C -2.1097316 3.3070257 -3.7464935  
H -2.3305327 4.3044257 -4.1356282  
C 0.4689549 4.0157263 0.8860733  
H 0.3516335 4.4905376 -0.0914539  
C 0.9078100 4.7555695 1.9814755  
H 1.1334757 5.8193487 1.8691293  
C 1.0702357 4.1366558 3.2208302  
H 1.4259250 4.7126308 4.0789546  
C -3.1356464 0.9198420 5.0274922  
H -3.6295427 1.7671815 5.5102469  
C -1.5373016 2.3454270 -4.5762246  
H -1.3081708 2.5860806 -5.6175236

**PNacAgCd (8)**

84

8 PNacAgCdI2 Singlet E(DFT)=-3283.5812901 ZPVE=0.6563733



|    |           |            |            |
|----|-----------|------------|------------|
| I  | 6.3519593 | 12.7790548 | 6.7133021  |
| I  | 7.9284129 | 8.2558780  | 7.6838760  |
| Cd | 5.9758868 | 10.0883742 | 7.4089293  |
| Ag | 3.4910851 | 12.1359540 | 6.9692632  |
| P  | 2.7238714 | 11.5294677 | 4.7361025  |
| P  | 2.9499920 | 12.6564797 | 9.2884204  |
| N  | 4.4716910 | 10.1288350 | 9.1173817  |
| N  | 4.1683031 | 9.3224116  | 6.2294855  |
| C  | 1.0388420 | 10.8208340 | 4.6560538  |
| C  | 0.0581612 | 11.3481957 | 5.5028042  |
| H  | 0.3161113 | 12.1605036 | 6.1881513  |
| C  | 3.3492029 | 8.4504629  | 6.8064661  |
| C  | 2.7022855 | 14.4373789 | 9.6073399  |
| C  | 4.2803115 | 12.1642531 | 10.4403906 |
| C  | 4.7276214 | 12.9703315 | 11.4910769 |
| H  | 4.2659284 | 13.9454788 | 11.6613710 |
| C  | 5.2816750 | 8.3672472  | 4.2841972  |
| H  | 5.7653842 | 7.6486708  | 4.9500091  |
| C  | 3.7534638 | 15.2969267 | 9.2554999  |
| H  | 4.6844358 | 14.8843579 | 8.8539574  |
| C  | 3.6103453 | 9.1325619  | 9.2562757  |
| C  | 4.8813715 | 10.9096256 | 10.2168840 |
| C  | 5.7686404 | 12.5487658 | 12.3114461 |
| H  | 6.1138808 | 13.1892724 | 13.1265507 |
| C  | 4.3926180 | 9.2994415  | 4.8369294  |
| C  | 3.8132691 | 10.2685786 | 3.9933531  |
| C  | 2.4286724 | 17.2074175 | 9.9036607  |
| H  | 2.3217952 | 18.2889221 | 10.0212915 |
| C  | 5.5687923 | 8.3757166  | 2.9255694  |
| H  | 6.2691841 | 7.6416343  | 2.5189182  |

|   |            |            |            |
|---|------------|------------|------------|
| C | 3.1090230  | 8.3612416  | 8.1896838  |
| H | 2.4116400  | 7.5781781  | 8.4827280  |
| C | 3.1146540  | 8.7783617  | 10.6396459 |
| H | 3.9407423  | 8.3584819  | 11.2375833 |
| H | 2.3016368  | 8.0409813  | 10.5967638 |
| H | 2.7524909  | 9.6706532  | 11.1719904 |
| C | 1.5101165  | 14.9807278 | 10.0906722 |
| H | 0.6750652  | 14.3283854 | 10.3531306 |
| C | 0.6971215  | 9.7863605  | 3.7799791  |
| H | 1.4529351  | 9.3693337  | 3.1101103  |
| C | 4.9824609  | 9.3246390  | 2.0887206  |
| H | 5.2131411  | 9.3400179  | 1.0209098  |
| C | 2.7019694  | 12.8770086 | 3.5014397  |
| C | -0.6011597 | 9.2814163  | 3.7608942  |
| H | -0.8562661 | 8.4683438  | 3.0763670  |
| C | 5.9412960  | 10.5054757 | 11.0355234 |
| H | 6.4292992  | 9.5497945  | 10.8291277 |
| C | 3.6190266  | 16.6714213 | 9.4114925  |
| H | 4.4477003  | 17.3297879 | 9.1388491  |
| C | 1.3758139  | 16.3612316 | 10.2370871 |
| H | 0.4377289  | 16.7750597 | 10.6162316 |
| C | 4.1165803  | 10.2687740 | 2.6262355  |
| H | 3.6761755  | 11.0290900 | 1.9772865  |
| C | 1.6318512  | 13.1001460 | 2.6316170  |
| H | 0.7527770  | 12.4529371 | 2.6650659  |
| C | 6.3777300  | 11.3171578 | 12.0763037 |
| H | 7.2088345  | 10.9870535 | 12.7048504 |
| C | 1.4762982  | 11.8014578 | 9.9501192  |
| C | 1.1215899  | 11.8852349 | 11.3026741 |
| H | 1.7147934  | 12.5000499 | 11.9850379 |

|   |            |            |            |
|---|------------|------------|------------|
| C | 2.6005406  | 7.4654892  | 5.9355228  |
| H | 2.0806064  | 7.9844525  | 5.1163711  |
| H | 1.8605513  | 6.8998010  | 6.5179517  |
| H | 3.3015965  | 6.7518496  | 5.4729308  |
| C | 2.7963436  | 14.9808107 | 1.6620492  |
| H | 2.8325647  | 15.8034328 | 0.9429893  |
| C | -1.2405527 | 10.8479385 | 5.4799585  |
| H | -1.9959256 | 11.2684496 | 6.1488522  |
| C | -1.5703996 | 9.8086352  | 4.6117317  |
| H | -2.5874648 | 9.4082711  | 4.5976164  |
| C | 3.8184241  | 13.7219395 | 3.4499823  |
| H | 4.6574933  | 13.5607288 | 4.1336824  |
| C | 0.0283864  | 11.1753250 | 11.7867039 |
| H | -0.2416166 | 11.2462332 | 12.8434790 |
| C | 1.6801353  | 14.1507338 | 1.7166062  |
| H | 0.8373434  | 14.3187112 | 1.0409789  |
| C | 3.8662742  | 14.7633308 | 2.5297834  |
| H | 4.7440935  | 15.4134665 | 2.4953010  |
| C | 0.7334081  | 10.9803519 | 9.1002113  |
| H | 1.0283553  | 10.8758027 | 8.0540041  |
| C | -0.7142117 | 10.3634278 | 10.9274159 |
| H | -1.5681335 | 9.7995099  | 11.3120653 |
| C | -0.3589641 | 10.2637718 | 9.5857443  |
| H | -0.9246187 | 9.6188280  | 8.9084353  |

84

8 PNAcAgCdI2 Triplet E(DFT)=-3283.4846507 ZPVE=0.6531703

|    |           |            |           |
|----|-----------|------------|-----------|
| I  | 6.4331970 | 12.7994228 | 6.7379515 |
| I  | 7.9161864 | 8.2016978  | 7.2433707 |
| Cd | 6.0076468 | 10.0872614 | 7.3660690 |
| Ag | 3.5913003 | 12.2128209 | 6.9422721 |

|   |           |            |            |
|---|-----------|------------|------------|
| P | 2.7846215 | 11.6425268 | 4.7154106  |
| P | 2.9839145 | 12.5291897 | 9.2829290  |
| N | 4.7352439 | 10.1100392 | 9.2121960  |
| N | 4.0860546 | 9.4013448  | 6.2780067  |
| C | 1.0563785 | 11.0427826 | 4.6724673  |
| C | 0.1146379 | 11.6850085 | 5.4841842  |
| H | 0.4263772 | 12.5204706 | 6.1181774  |
| C | 3.2747833 | 8.5068436  | 6.9221966  |
| C | 2.5839160 | 14.2863990 | 9.5926230  |
| C | 4.3271397 | 12.1596556 | 10.4663481 |
| C | 4.6859017 | 13.0294414 | 11.5007300 |
| H | 4.1162477 | 13.9478409 | 11.6580736 |
| C | 5.0066068 | 8.2262803  | 4.3514234  |
| H | 5.4196022 | 7.4808983  | 5.0337730  |
| C | 3.5422110 | 15.2330619 | 9.2009773  |
| H | 4.4917472 | 14.9012104 | 8.7687491  |
| C | 3.7878260 | 9.1481393  | 9.4196408  |
| C | 5.0744671 | 10.9815031 | 10.2605302 |
| C | 5.7760835 | 12.7496118 | 12.3180489 |
| H | 6.0466266 | 13.4400955 | 13.1203966 |
| C | 4.2646688 | 9.2904191  | 4.8875355  |
| C | 3.7729888 | 10.2821897 | 4.0139682  |
| C | 2.0797702 | 17.0235041 | 9.8930825  |
| H | 1.8824854 | 18.0921326 | 10.0114964 |
| C | 5.2561249 | 8.1498811  | 2.9886529  |
| H | 5.8511474 | 7.3204095  | 2.5978543  |
| C | 3.1906345 | 8.4527886  | 8.3396952  |
| H | 2.4682519 | 7.7061316  | 8.6813246  |
| C | 3.3975760 | 8.7784693  | 10.8264140 |
| H | 4.2507993 | 8.3419313  | 11.3790972 |

|   |            |            |            |
|---|------------|------------|------------|
| H | 2.5803190  | 8.0414018  | 10.8281310 |
| H | 3.0566817  | 9.6501557  | 11.4099142 |
| C | 1.3680721  | 14.7256940 | 10.1200621 |
| H | 0.6046850  | 14.0038643 | 10.4163232 |
| C | 0.6485306  | 9.9711553  | 3.8729511  |
| H | 1.3742569  | 9.4612258  | 3.2353308  |
| C | 4.7716300  | 9.1333981  | 2.1257312  |
| H | 4.9758362  | 9.0798509  | 1.0538037  |
| C | 2.8486281  | 12.9484210 | 3.4407216  |
| C | -0.6783891 | 9.5463663  | 3.8911854  |
| H | -0.9854496 | 8.7033138  | 3.2669323  |
| C | 6.1840614  | 10.7232798 | 11.0708238 |
| H | 6.7716185  | 9.8224673  | 10.8794143 |
| C | 3.2940971  | 16.5913025 | 9.3588107  |
| H | 4.0514353  | 17.3182438 | 9.0547815  |
| C | 1.1186223  | 16.0901541 | 10.2679565 |
| H | 0.1626381  | 16.4223176 | 10.6811887 |
| C | 4.0365238  | 10.1927847 | 2.6416485  |
| H | 3.6632816  | 10.9700629 | 1.9709207  |
| C | 1.7950071  | 13.2090146 | 2.5610919  |
| H | 0.8768587  | 12.6198387 | 2.6147332  |
| C | 6.5296582  | 11.5992375 | 12.0936102 |
| H | 7.3998673  | 11.3822896 | 12.7184717 |
| C | 1.5381506  | 11.5791723 | 9.8661807  |
| C | 1.1720610  | 11.5416246 | 11.2162754 |
| H | 1.7605467  | 12.0908908 | 11.9564016 |
| C | 2.4289108  | 7.5446376  | 6.1267867  |
| H | 1.8595323  | 8.0663305  | 5.3382322  |
| H | 1.7033391  | 7.0328412  | 6.7775599  |
| H | 3.0272781  | 6.7655151  | 5.6198150  |

|   |            |            |            |
|---|------------|------------|------------|
| C | 3.0781507  | 14.9767062 | 1.5308322  |
| H | 3.1673318  | 15.7699327 | 0.7839030  |
| C | -1.2120434 | 11.2650600 | 5.4973023  |
| H | -1.9364121 | 11.7745248 | 6.1379218  |
| C | -1.6093662 | 10.1902894 | 4.7031422  |
| H | -2.6490761 | 9.8529871  | 4.7180150  |
| C | 4.0171319  | 13.7175072 | 3.3635491  |
| H | 4.8435788  | 13.5268341 | 4.0550592  |
| C | 0.0688971  | 10.7970697 | 11.6231004 |
| H | -0.2098828 | 10.7713685 | 12.6796462 |
| C | 1.9108338  | 14.2221987 | 1.6108261  |
| H | 1.0810859  | 14.4202869 | 0.9272681  |
| C | 4.1317996  | 14.7213646 | 2.4080995  |
| H | 5.0494573  | 15.3123993 | 2.3532453  |
| C | 0.7955825  | 10.8482058 | 8.9358081  |
| H | 1.0952237  | 10.8452528 | 7.8851228  |
| C | -0.6725917 | 10.0772815 | 10.6862698 |
| H | -1.5357050 | 9.4891116  | 11.0091950 |
| C | -0.3077749 | 10.1021194 | 9.3420613  |
| H | -0.8771854 | 9.5343707  | 8.6016205  |

### **PNacCu (9)**

81

9 PNacCu Singlet E(DFT)=-4013.7692983 ZPVE=0.6535853

|    |           |            |           |
|----|-----------|------------|-----------|
| Cu | 2.3194282 | 1.2636571  | 3.0122256 |
| P  | 2.2474574 | -0.7579626 | 4.0769189 |
| P  | 1.5652805 | 3.2788767  | 3.6822716 |
| N  | 2.1918272 | 0.0294587  | 1.3815686 |
| N  | 3.9519752 | 2.3361142  | 2.3654166 |
| C  | 3.1112740 | 0.0611935  | 0.4377371 |
| C  | 4.0819795 | 1.0826741  | 0.3068569 |

|   |            |            |            |
|---|------------|------------|------------|
| H | 4.6664388  | 1.0254300  | -0.6133608 |
| C | 4.4281184  | 2.1650198  | 1.1447276  |
| C | 5.4113530  | 3.1513307  | 0.5397335  |
| H | 6.4537088  | 2.8830257  | 0.7828574  |
| H | 5.2376094  | 4.1727051  | 0.9103168  |
| H | 5.3181374  | 3.1537266  | -0.5559822 |
| C | 3.1897774  | -1.0385431 | -0.6045522 |
| H | 2.9096348  | -2.0135066 | -0.1775538 |
| H | 4.2104343  | -1.1107733 | -1.0069999 |
| H | 2.5098680  | -0.8399252 | -1.4505237 |
| C | 1.2390699  | -0.9761946 | 1.5509291  |
| C | 1.1034930  | -1.5108061 | 2.8568293  |
| C | 0.1503358  | -2.4892379 | 3.1240868  |
| H | 0.0577518  | -2.8935275 | 4.1355617  |
| C | -0.6986547 | -2.9432024 | 2.1153369  |
| H | -1.4492835 | -3.7072046 | 2.3320528  |
| C | -0.5908205 | -2.4017025 | 0.8367887  |
| H | -1.2654389 | -2.7361280 | 0.0435924  |
| C | 0.3634406  | -1.4273874 | 0.5550906  |
| H | 0.4193067  | -0.9905841 | -0.4429026 |
| C | 3.7780410  | -1.7336809 | 3.8411989  |
| C | 3.7999969  | -3.1321581 | 3.8952028  |
| H | 2.8829346  | -3.6829174 | 4.1224323  |
| C | 4.9796925  | -3.8261246 | 3.6485242  |
| H | 4.9890354  | -4.9184652 | 3.6936149  |
| C | 6.1462160  | -3.1285003 | 3.3317568  |
| H | 7.0717111  | -3.6752529 | 3.1313697  |
| C | 6.1276112  | -1.7386571 | 3.2603416  |
| H | 7.0352829  | -1.1891175 | 2.9977847  |
| C | 4.9470951  | -1.0421126 | 3.5133653  |

|   |            |            |            |
|---|------------|------------|------------|
| H | 4.9207932  | 0.0482102  | 3.4327219  |
| C | 1.5714132  | -1.2464383 | 5.7013354  |
| C | 2.3034728  | -1.9416709 | 6.6678234  |
| H | 3.3070902  | -2.3043413 | 6.4362560  |
| C | 1.7629861  | -2.1733929 | 7.9322860  |
| H | 2.3482284  | -2.7189198 | 8.6773975  |
| C | 0.4869667  | -1.7146964 | 8.2461746  |
| H | 0.0647787  | -1.8992982 | 9.2375128  |
| C | -0.2485037 | -1.0132529 | 7.2903121  |
| H | -1.2477542 | -0.6396882 | 7.5291606  |
| C | 0.2926961  | -0.7747671 | 6.0324709  |
| H | -0.2813042 | -0.2042620 | 5.2963832  |
| C | 4.2901652  | 3.3633926  | 3.2422500  |
| C | 3.2393149  | 3.9618845  | 3.9862335  |
| C | 3.5142444  | 4.9515051  | 4.9282703  |
| H | 2.6924530  | 5.3918506  | 5.4994354  |
| C | 4.8219804  | 5.3696552  | 5.1634423  |
| H | 5.0283996  | 6.1422805  | 5.9078916  |
| C | 5.8618048  | 4.7688639  | 4.4577178  |
| H | 6.8966032  | 5.0653070  | 4.6516193  |
| C | 5.6036188  | 3.7776678  | 3.5163842  |
| H | 6.4345266  | 3.2908185  | 3.0054985  |
| C | 0.8005711  | 4.4263135  | 2.4796726  |
| C | -0.3343117 | 3.9800803  | 1.7924166  |
| H | -0.7181009 | 2.9732159  | 1.9824401  |
| C | -0.9676773 | 4.8008380  | 0.8647002  |
| H | -1.8544870 | 4.4412791  | 0.3361392  |
| C | -0.4618849 | 6.0727242  | 0.5997706  |
| H | -0.9531360 | 6.7155452  | -0.1356214 |
| C | 0.6767739  | 6.5181567  | 1.2667352  |



|   |            |           |           |
|---|------------|-----------|-----------|
| H | 1.0821447  | 7.5114635 | 1.0560586 |
| C | 1.3053685  | 5.6998468 | 2.2033980 |
| H | 2.2002606  | 6.0529923 | 2.7209913 |
| C | 0.6787503  | 3.6110155 | 5.2470106 |
| C | 0.8730817  | 2.6928519 | 6.2863494 |
| H | 1.5273204  | 1.8311392 | 6.1280345 |
| C | 0.2327089  | 2.8620812 | 7.5089119 |
| H | 0.3928579  | 2.1330540 | 8.3076644 |
| C | -0.6210250 | 3.9476839 | 7.7034508 |
| H | -1.1312814 | 4.0796032 | 8.6613886 |
| C | -0.8277942 | 4.8598076 | 6.6713573 |
| H | -1.4997317 | 5.7098074 | 6.8177976 |
| C | -0.1808041 | 4.6941346 | 5.4474387 |
| H | -0.3501793 | 5.4126862 | 4.6418628 |

81

9 PNaCu Triplet E(DFT)=-4013.6979333 ZPVE=0.6517480

|    |           |            |            |
|----|-----------|------------|------------|
| Cu | 2.6312380 | 1.2571430  | 2.6690772  |
| P  | 2.0769525 | -0.6147629 | 3.8770447  |
| P  | 1.9194111 | 3.1024814  | 3.8200092  |
| N  | 2.4789832 | -0.0120592 | 1.1827638  |
| N  | 4.0019729 | 2.4958146  | 1.9972460  |
| C  | 3.3680080 | 0.0800453  | 0.1265622  |
| C  | 4.1982593 | 1.1900775  | -0.0557072 |
| H  | 4.7499600 | 1.1617555  | -1.0007655 |
| C  | 4.4713177 | 2.3353353  | 0.7038620  |
| C  | 5.2097893 | 3.4564854  | 0.0066984  |
| H  | 6.3031333 | 3.4584619  | 0.1758990  |
| H  | 4.8359684 | 4.4417332  | 0.3327506  |
| H  | 5.0571479 | 3.3866244  | -1.0813514 |
| C  | 3.5456209 | -1.0830595 | -0.8231457 |

|   |            |            |            |
|---|------------|------------|------------|
| H | 3.4317782  | -2.0453470 | -0.2953624 |
| H | 4.5548472  | -1.0601119 | -1.2622462 |
| H | 2.8297393  | -1.0960110 | -1.6660592 |
| C | 1.4771719  | -0.9444055 | 1.2810505  |
| C | 1.0783865  | -1.3701490 | 2.5831155  |
| C | 0.0316231  | -2.2678910 | 2.7808775  |
| H | -0.2442370 | -2.5568045 | 3.7993185  |
| C | -0.6640751 | -2.7879402 | 1.6949636  |
| H | -1.4858200 | -3.4915842 | 1.8440832  |
| C | -0.2967159 | -2.3757253 | 0.4092698  |
| H | -0.8503767 | -2.7526709 | -0.4560618 |
| C | 0.7396793  | -1.4799587 | 0.1963049  |
| H | 0.9582129  | -1.1475027 | -0.8164575 |
| C | 3.5442264  | -1.6698299 | 4.1034851  |
| C | 3.4336851  | -3.0510254 | 4.2984011  |
| H | 2.4461249  | -3.5193598 | 4.3302010  |
| C | 4.5769761  | -3.8302305 | 4.4374997  |
| H | 4.4855782  | -4.9090035 | 4.5884412  |
| C | 5.8383040  | -3.2368379 | 4.3723056  |
| H | 6.7362075  | -3.8519477 | 4.4757832  |
| C | 5.9544579  | -1.8655302 | 4.1632299  |
| H | 6.9408180  | -1.3999374 | 4.0957059  |
| C | 4.8098353  | -1.0827069 | 4.0265254  |
| H | 4.9018548  | -0.0090578 | 3.8368371  |
| C | 1.1138506  | -0.6970244 | 5.4151161  |
| C | 1.6090692  | -1.2667593 | 6.5906671  |
| H | 2.5910923  | -1.7443909 | 6.5954334  |
| C | 0.8521863  | -1.2317775 | 7.7608718  |
| H | 1.2477226  | -1.6853157 | 8.6735448  |
| C | -0.3996017 | -0.6246810 | 7.7679319  |

|   |            |            |           |
|---|------------|------------|-----------|
| H | -0.9903982 | -0.5955917 | 8.6871470 |
| C | -0.8958326 | -0.0450878 | 6.6003425 |
| H | -1.8721786 | 0.4453356  | 6.6021520 |
| C | -0.1432314 | -0.0769623 | 5.4338244 |
| H | -0.5343284 | 0.3870174  | 4.5240211 |
| C | 4.4184875  | 3.4747136  | 2.8615157 |
| C | 3.5180972  | 3.9215331  | 3.8769634 |
| C | 3.8869082  | 4.8722742  | 4.8288266 |
| H | 3.1652702  | 5.1690943  | 5.5956229 |
| C | 5.1588211  | 5.4306983  | 4.8158430 |
| H | 5.4502878  | 6.1756309  | 5.5591675 |
| C | 6.0640506  | 4.9942085  | 3.8410629 |
| H | 7.0825555  | 5.3943355  | 3.8337799 |
| C | 5.7174064  | 4.0462247  | 2.8927866 |
| H | 6.4718034  | 3.6994097  | 2.1904548 |
| C | 0.7816328  | 4.1149633  | 2.8225004 |
| C | -0.2335243 | 3.4684529  | 2.1099833 |
| H | -0.3118348 | 2.3773073  | 2.1432477 |
| C | -1.1323880 | 4.2058636  | 1.3442114 |
| H | -1.9205451 | 3.6930828  | 0.7871851 |
| C | -1.0136361 | 5.5925154  | 1.2772255 |
| H | -1.7139490 | 6.1720077  | 0.6698144 |
| C | 0.0054016  | 6.2404418  | 1.9739661 |
| H | 0.1061888  | 7.3271546  | 1.9126039 |
| C | 0.9021998  | 5.5051804  | 2.7439871 |
| H | 1.7096570  | 6.0105650  | 3.2798348 |
| C | 1.2583698  | 3.1263824  | 5.5135014 |
| C | 1.9840232  | 2.4574038  | 6.5083933 |
| H | 2.9312483  | 1.9719891  | 6.2569980 |
| C | 1.5076898  | 2.4063456  | 7.8115093 |

|   |            |           |           |
|---|------------|-----------|-----------|
| H | 2.0805651  | 1.8786797 | 8.5776806 |
| C | 0.2944697  | 3.0136490 | 8.1361608 |
| H | -0.0829143 | 2.9681833 | 9.1610763 |
| C | -0.4361625 | 3.6712251 | 7.1516461 |
| H | -1.3872661 | 4.1492328 | 7.4006937 |
| C | 0.0422771  | 3.7286016 | 5.8432060 |
| H | -0.5350673 | 4.2499484 | 5.0765042 |
